# Supplementary material for: Avenue to phosphaalkenes from Ph3GePCO
Source: Royal Society of Chemistry journal article supplement (doi:10.1039/c9dt04590b), 2019-12-16
Supplement: c9dt04590b1.pdf [file c9dt04590b1.pdf]

# **Avenue to Phosphaalkenes from $\text{Ph}_3\text{GePCO}$**

Kevin M. Szkop, Andrew R. Jupp, Hlib Razumkov, Douglas W. Stephan\*

## **Supplemental Information**

## Table of Contents

|                                                                                |    |
|--------------------------------------------------------------------------------|----|
| Spectra of (Z)-2 .....                                                         | 3  |
| Spectra of (E)-2 .....                                                         | 5  |
| Thermal isomerization of (Z)-2 and (E)-2 .....                                 | 8  |
| Photolysis of (Z)-2 .....                                                      | 9  |
| Photolysis of (E)-2 .....                                                      | 10 |
| Reaction of (E)-2 with <i>t</i> -Bu <sub>2</sub> P-SiMe <sub>3</sub> .....     | 11 |
| Independent <i>in-situ</i> syntheses and characterization of (E)-3/(Z)-3 ..... | 12 |
| Reaction of (E)-2 with Ph <sub>2</sub> P-SiPh <sub>3</sub> .....               | 13 |
| Independent <i>in-situ</i> syntheses and characterization of (E)-4/(Z)-4 ..... | 14 |
| Reaction of (E)-2 with Ph <sub>2</sub> P-SiMe <sub>3</sub> .....               | 15 |
| Independent <i>in-situ</i> syntheses and characterization of (E)-5/(Z)-5 ..... | 16 |
| Computational details .....                                                    | 17 |
| REFERENCES .....                                                               | 31 |

## List of Figures

|                                                                                                                               |    |
|-------------------------------------------------------------------------------------------------------------------------------|----|
| Figure 1. <sup>1</sup> H NMR spectrum of (Z)-2 (C <sub>6</sub> D <sub>6</sub> ) .....                                         | 3  |
| Figure 2. <sup>13</sup> C{ <sup>1</sup> H} NMR spectrum of (Z)-2 (C <sub>6</sub> D <sub>6</sub> ) .....                       | 3  |
| Figure 3. <sup>31</sup> P{ <sup>1</sup> H} NMR spectrum of (Z)-2 (C <sub>6</sub> D <sub>6</sub> ) .....                       | 4  |
| Figure 4. <sup>29</sup> Si- <sup>1</sup> H HMBC NMR spectrum of (Z)-2 (C <sub>6</sub> D <sub>6</sub> ) .....                  | 4  |
| Figure 5. ATR IR spectrum of (Z)-2 .....                                                                                      | 5  |
| Figure 6. <sup>1</sup> H NMR spectrum of (E)-2 (C <sub>6</sub> D <sub>6</sub> ) .....                                         | 5  |
| Figure 7. <sup>13</sup> C{ <sup>1</sup> H} NMR spectrum of (E)-2 (C <sub>6</sub> D <sub>6</sub> ) .....                       | 6  |
| Figure 8. <sup>31</sup> P{ <sup>1</sup> H} NMR spectrum of (E)-2 (C <sub>6</sub> D <sub>6</sub> ) .....                       | 6  |
| Figure 9. <sup>29</sup> Si- <sup>1</sup> H HMBC NMR spectrum of (E)-2 (C <sub>6</sub> D <sub>6</sub> ) .....                  | 7  |
| Figure 10. ATR IR spectrum of (E)-2 .....                                                                                     | 7  |
| Figure 11. <sup>31</sup> P{ <sup>1</sup> H} NMR spectra of heated solutions of (Z)-2 (THF) .....                              | 8  |
| Figure 12. <sup>31</sup> P{ <sup>1</sup> H} NMR spectra of heated solutions of (E)-2 (THF) .....                              | 8  |
| Figure 13. Stacked <sup>31</sup> P{ <sup>1</sup> H} NMR spectra of photolysis of (Z)-2 (C <sub>6</sub> D <sub>6</sub> ) ..... | 9  |
| Figure 14. Stacked <sup>31</sup> P{ <sup>1</sup> H} NMR spectra of photolysis of (E)-2 (C <sub>6</sub> D <sub>6</sub> ) ..... | 10 |
| Figure 15. Stacked <sup>31</sup> P{ <sup>1</sup> H} NMR spectra of displaying silane exchange (THF) .....                     | 11 |
| Figure 16. Stacked <sup>31</sup> P{ <sup>1</sup> H} NMR spectra of <i>in-situ</i> formation of (E)-3/(Z)-3 (THF) .....        | 12 |
| Figure 17. Stacked <sup>31</sup> P{ <sup>1</sup> H} NMR spectra of displaying phosphine exchange (THF) .....                  | 13 |
| Figure 18. Stacked <sup>31</sup> P{ <sup>1</sup> H} NMR spectra of <i>in-situ</i> formation of (E)-4/(Z)-4 (THF) .....        | 14 |
| Figure 19. Stacked <sup>31</sup> P{ <sup>1</sup> H} NMR spectra of displaying silylphosphine exchange (THF) .....             | 15 |
| Figure 20. <sup>31</sup> P{ <sup>1</sup> H} NMR spectrum of <i>in-situ</i> formation of (E)-5/(Z)-5 (THF) .....               | 16 |
| Figure 21. Optimised structures of (E)-2 (left) and (Z)-2 (right) (ωB97X-D/6-31G*). .....                                     | 17 |

## Spectra of (Z)-2

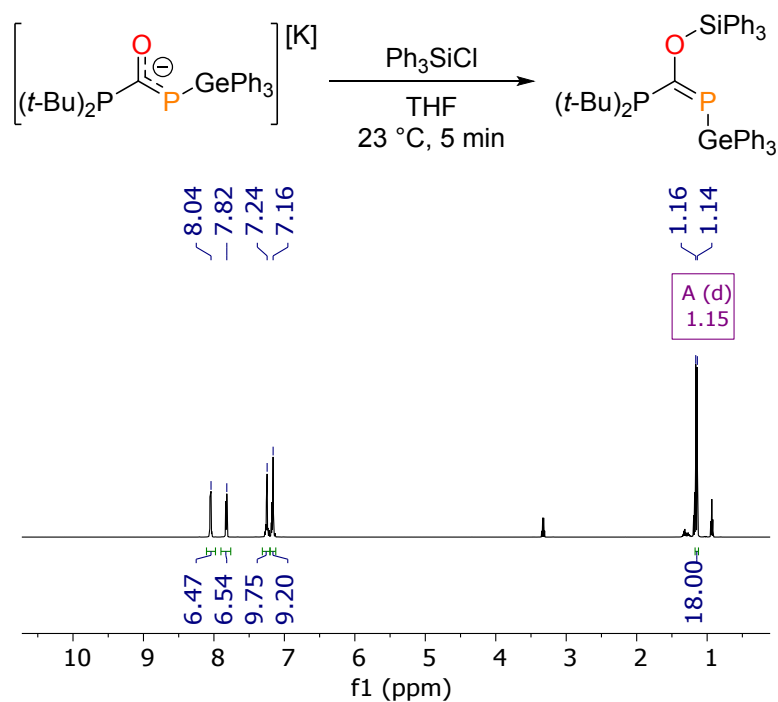

Figure 1. <sup>1</sup>H NMR spectrum of (Z)-2 (C<sub>6</sub>D<sub>6</sub>)

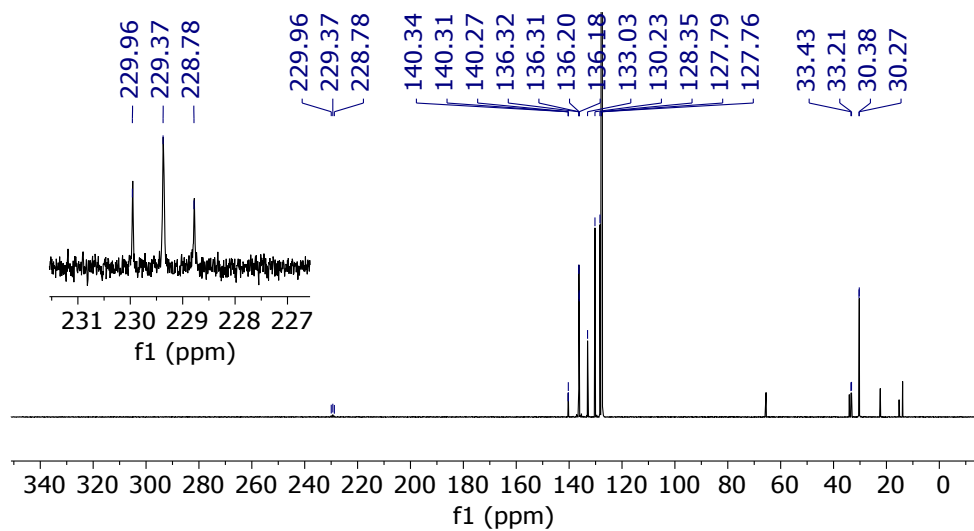

Figure 2. <sup>13</sup>C{<sup>1</sup>H} NMR spectrum of (Z)-2 (C<sub>6</sub>D<sub>6</sub>)

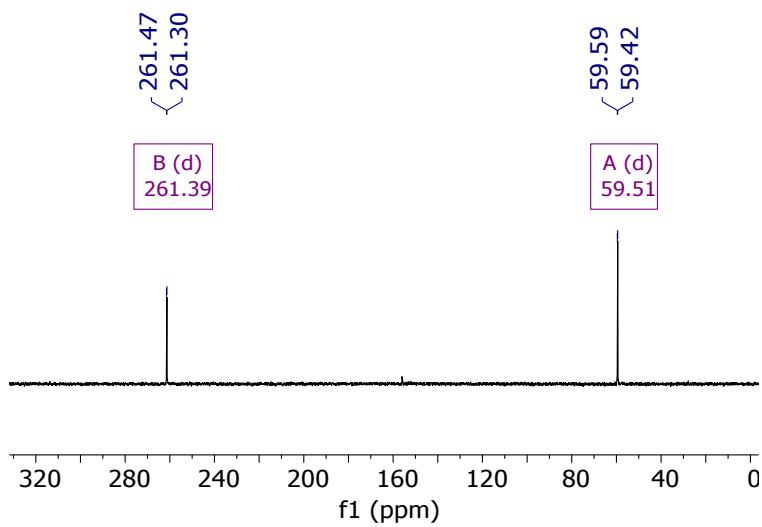

Figure 3.  $^{31}\text{P}\{^1\text{H}\}$  NMR spectrum of (Z)-2 ( $\text{C}_6\text{D}_6$ )

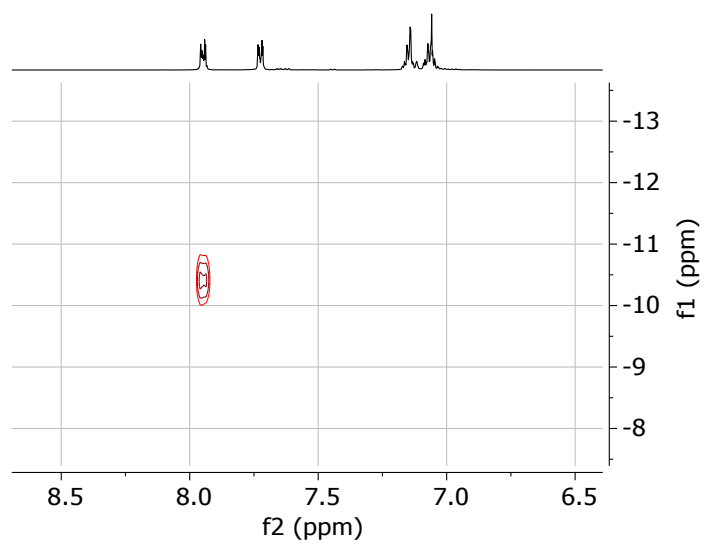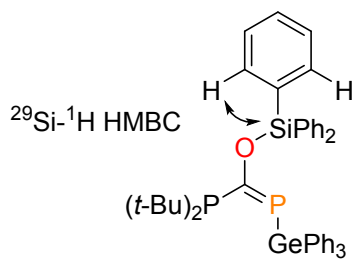

Figure Sx.

Figure 4.  $^{29}\text{Si}-^1\text{H}$  HMBC NMR spectrum of (Z)-2 ( $\text{C}_6\text{D}_6$ )

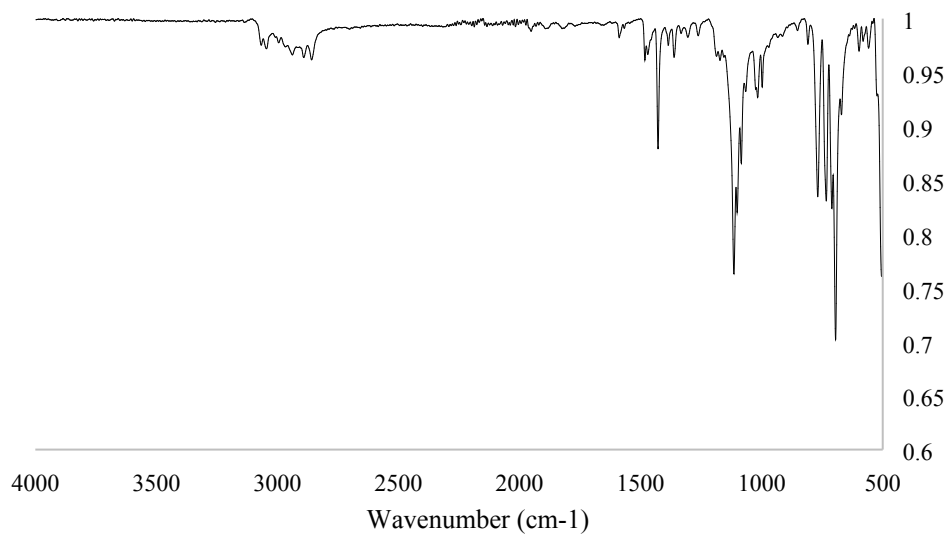

Figure 5. ATR IR spectrum of (Z)-2

## Spectra of (E)-2

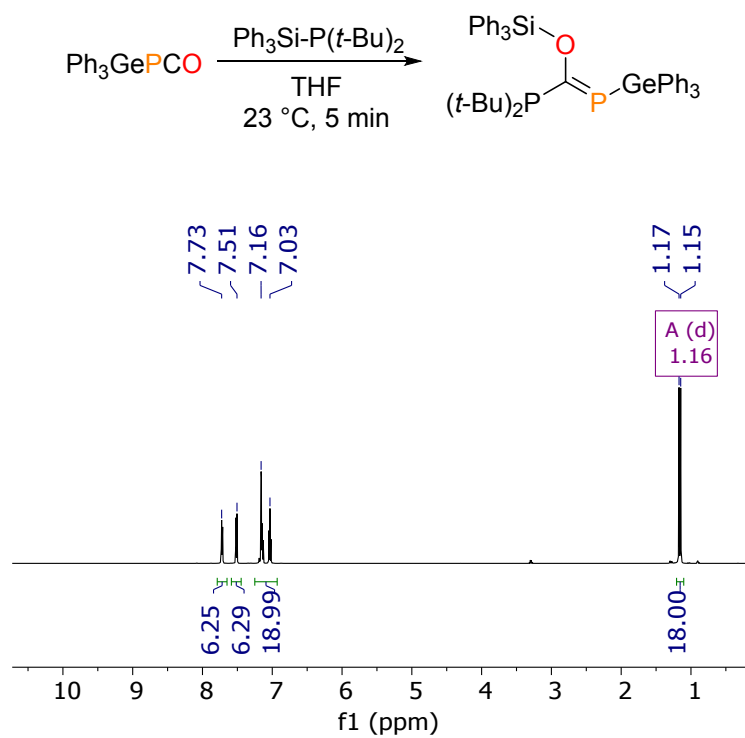

Figure 6. <sup>1</sup>H NMR spectrum of (E)-2 (C<sub>6</sub>D<sub>6</sub>)



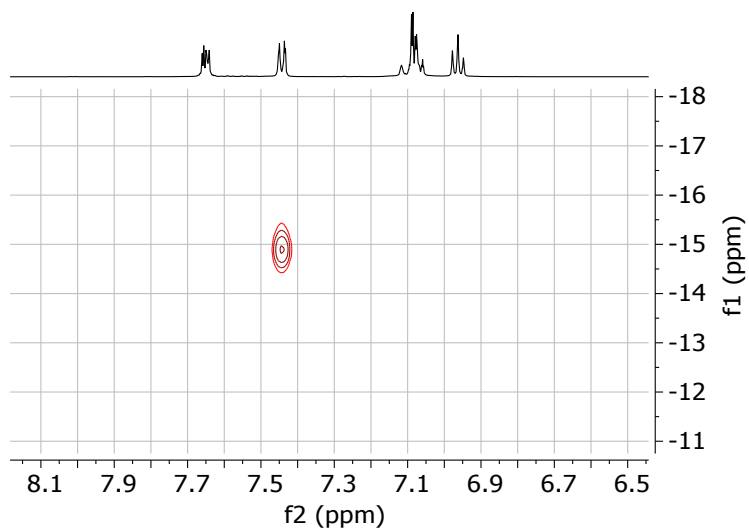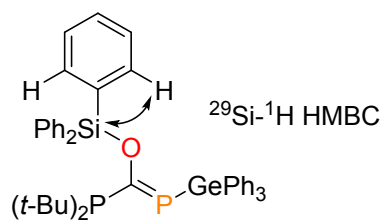

Figure 9.  $^{29}\text{Si}$ - $^1\text{H}$  HMBC NMR spectrum of (*E*)-**2** ( $\text{C}_6\text{D}_6$ )

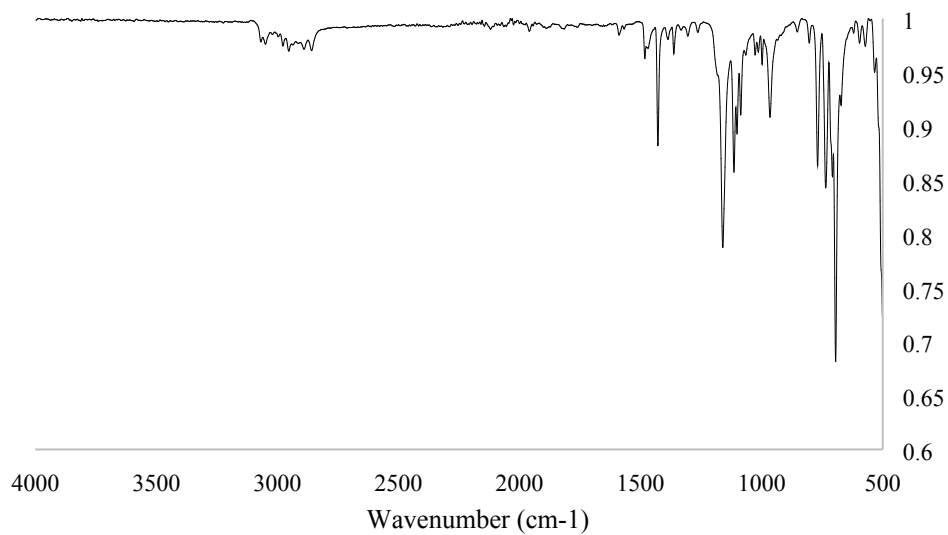

Figure 10. ATR IR spectrum of (*E*)-**2**

## Thermal isomerization of (Z)-2 and (E)-2

In the glovebox, solutions of (Z)-2 and (E)-2 (*ca.* 0.10 M) in tetrahydrofuran were charged into separate NMR tubes. Both solutions were maintained at ambient temperature for 24 hours, then heated in the same oil bath set to 55 °C for a total of 78 hours. The solutions were periodically removed from the oil bath and analyzed by  $^{31}\text{P}\{^1\text{H}\}$  NMR spectroscopy.

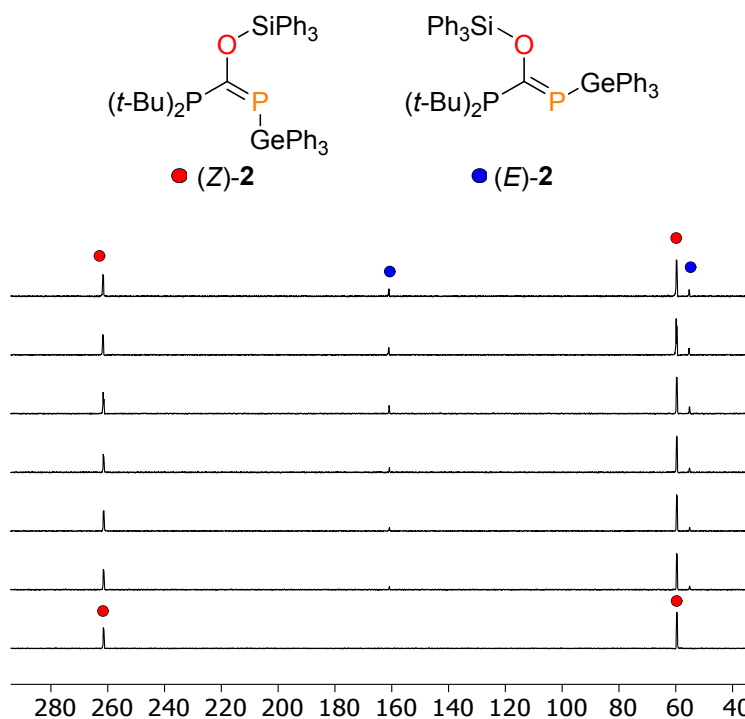

Figure 11.  $^{31}\text{P}\{^1\text{H}\}$  NMR spectra of heated solutions of (Z)-2 (THF)

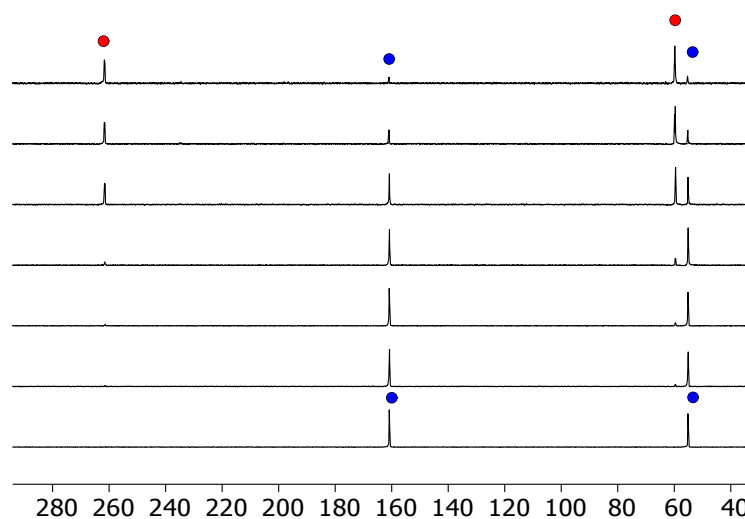

Figure 12.  $^{31}\text{P}\{^1\text{H}\}$  NMR spectra of heated solutions of (E)-2 (THF)

Time points (bottom to top): 1 h (23 °C), 24 h (23 °C), 1 h (55 °C), 4.5 h (55 °C), 30 h (55 °C), 55 h (55 °C), 78 h (55 °C)



## Photolysis of (Z)-2

A solution of (Z)-2 (13.8 mg, 0.018 mmol) in C<sub>6</sub>D<sub>6</sub> was transferred to a J-Young NMR tube and irradiated for 1 hour. Analysis by <sup>31</sup>P{<sup>1</sup>H} NMR spectroscopy revealed isomerization to (E)-2.

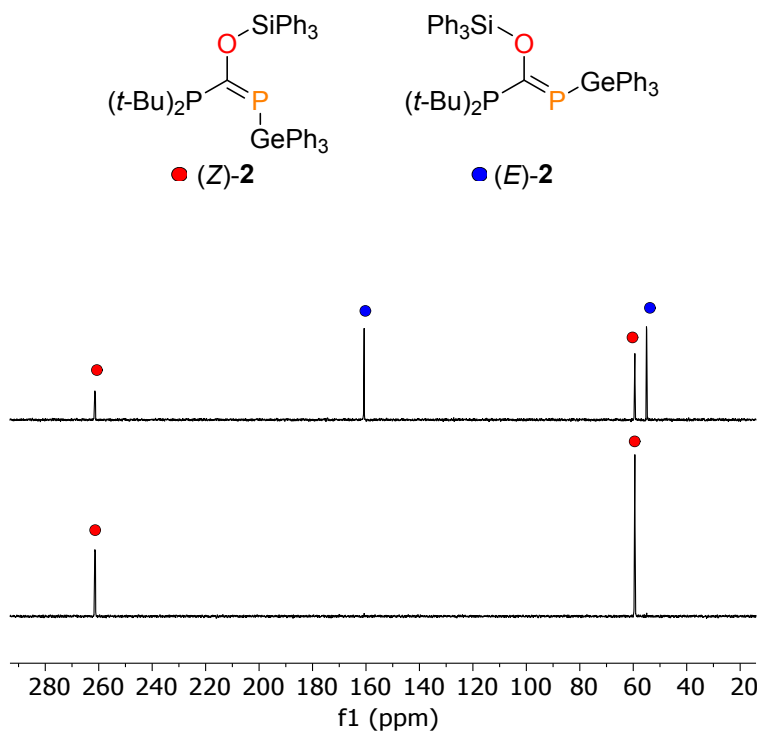

Figure 13. Stacked <sup>31</sup>P{<sup>1</sup>H} NMR spectra of photolysis of (Z)-2 (C<sub>6</sub>D<sub>6</sub>)

Reaction mixture before photolysis (bottom) and after 1 hour of irradiation (top)

## Photolysis of (*E*)-2

A solution of (*E*)-2 (18.6 mg, 0.024 mmol) in C<sub>6</sub>D<sub>6</sub> was transferred to a J-Young NMR tube and irradiated for 1 hour. Analysis by <sup>31</sup>P{<sup>1</sup>H} NMR spectroscopy revealed isomerization to (*Z*)-2.

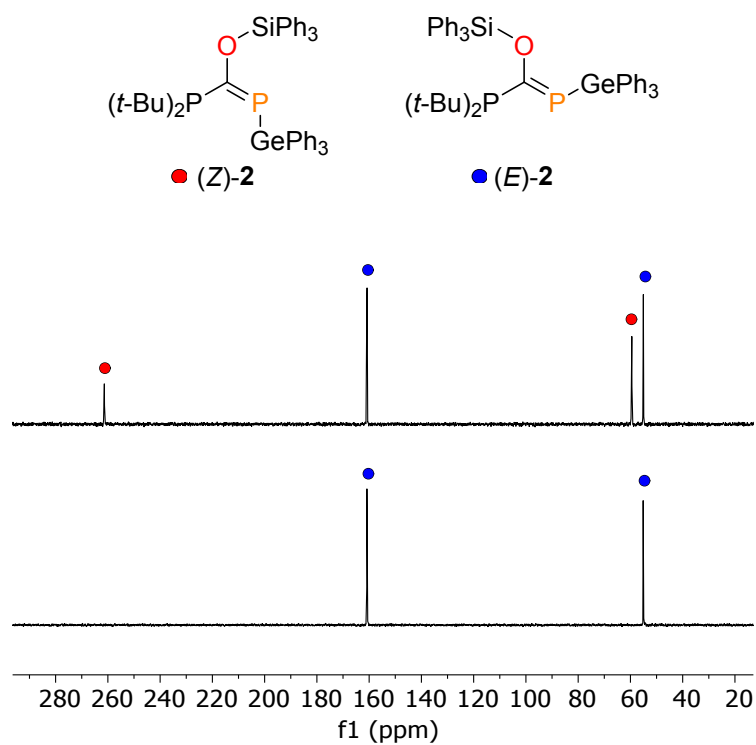

Figure 14. Stacked <sup>31</sup>P{<sup>1</sup>H} NMR spectra of photolysis of (*E*)-2 (C<sub>6</sub>D<sub>6</sub>)

Reaction mixture before photolysis (bottom) and after 1 hour of irradiation (top)

Reaction of (*E*)-**2** with *t*-Bu<sub>2</sub>P-SiMe<sub>3</sub>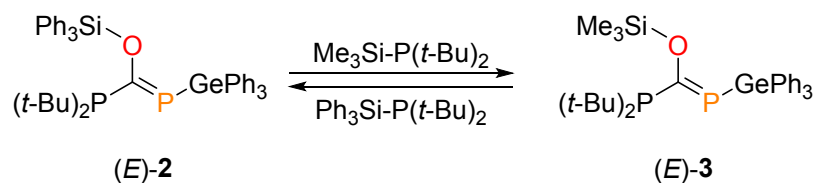

A solution of (*E*)-**2** (18.3 mg, 0.02 mmol, 1 equiv.) in tetrahydrofuran (0.3 mL) was combined with a solution of *t*-Bu<sub>2</sub>P-SiMe<sub>3</sub> (5.2 mg, 0.02 mmol, 1 equiv.) in tetrahydrofuran (0.3 mL). The homogenous yellow solution was transferred to an NMR tube and analyzed by <sup>31</sup>P{<sup>1</sup>H} NMR spectroscopy. Analysis after 30 minutes at ambient temperature shows a small amount of silane exchange as evidenced by the formation of (*E*)-**3**. The lack of signal attributed to (*Z*)-**2** or (*Z*)-**3** implied that silane exchange occurred without thermal isomerization. Heating the reaction mixture to 85 °C for 1.5 h showed increased silane exchange and the formation of (*Z*)-**2** or (*Z*)-**3**.

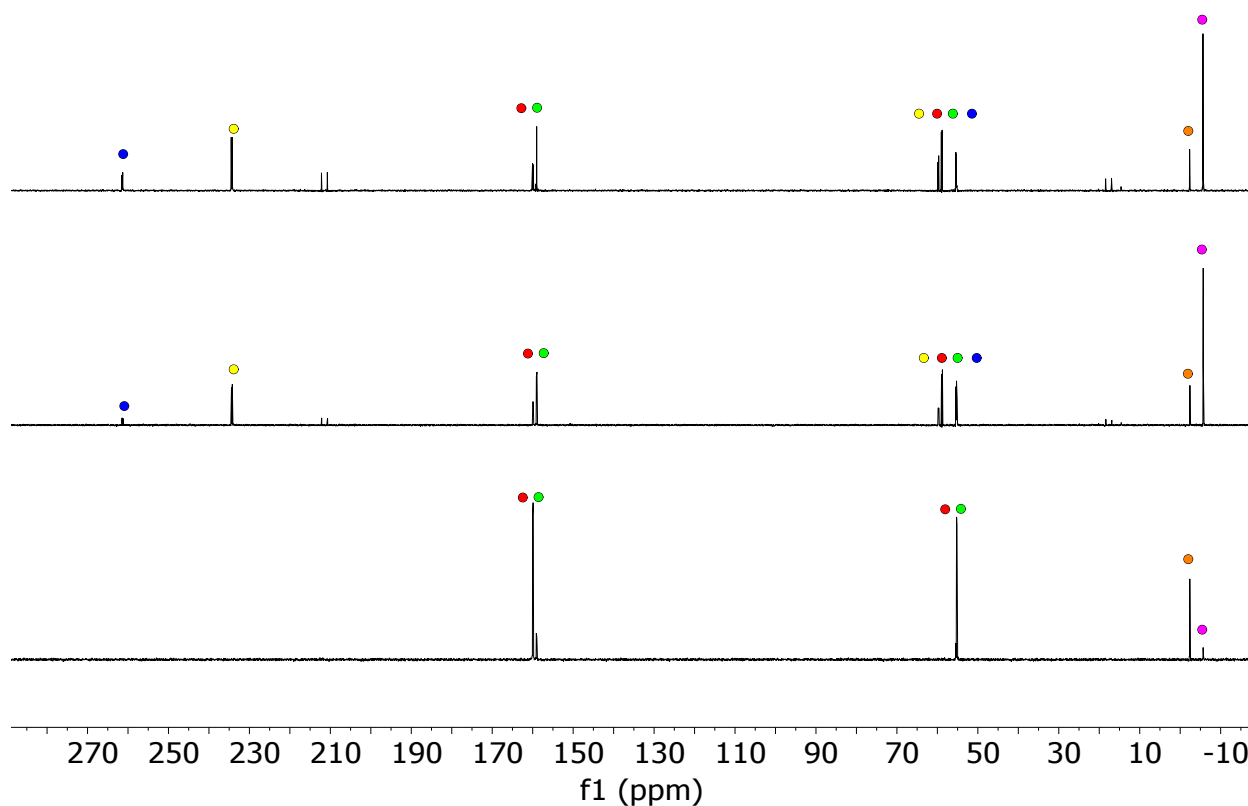

Figure 15. Stacked  $^{31}\text{P}\{^1\text{H}\}$  NMR spectra of displaying silane exchange (THF)

Bottom: 23 °C, 30 min. Middle: 85 °C, 1 h. Top: 85 °C, 2 h.

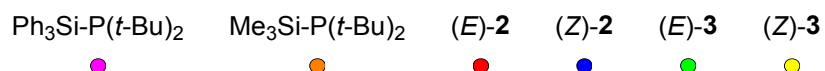

## Independent *in-situ* syntheses and characterization of (*E*)-**3**/(*Z*)-**3**

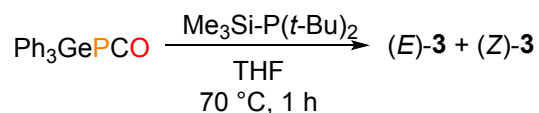

Equimolar solutions of  $\text{Ph}_3\text{GePCO}$  (20.4 mg, 0.06 mmol, 1 equiv.) and  $(t\text{-Bu})_2\text{P-SiMe}_3$  (12.3 mg, 0.06 mmol, 1 equiv.) were combined in tetrahydrofuran (*ca.* 0.6 mL). The pale-yellow reaction mixture was transferred to an NMR tube and analyzed by  $^{31}\text{P}\{^1\text{H}\}$  NMR spectroscopy, which showed complete conversion to (*E*)-**3** ( $\delta$  159 ppm, 55 ppm,  $^2J_{\text{PP}}$  = 20 Hz) and a small amount of (*Z*)-**3** ( $\delta$  234 ppm, 59 ppm,  $^2J_{\text{PP}}$  = 33 Hz). Heating to 70  $^\circ\text{C}$  for 1 hour leads to increased isomerization.

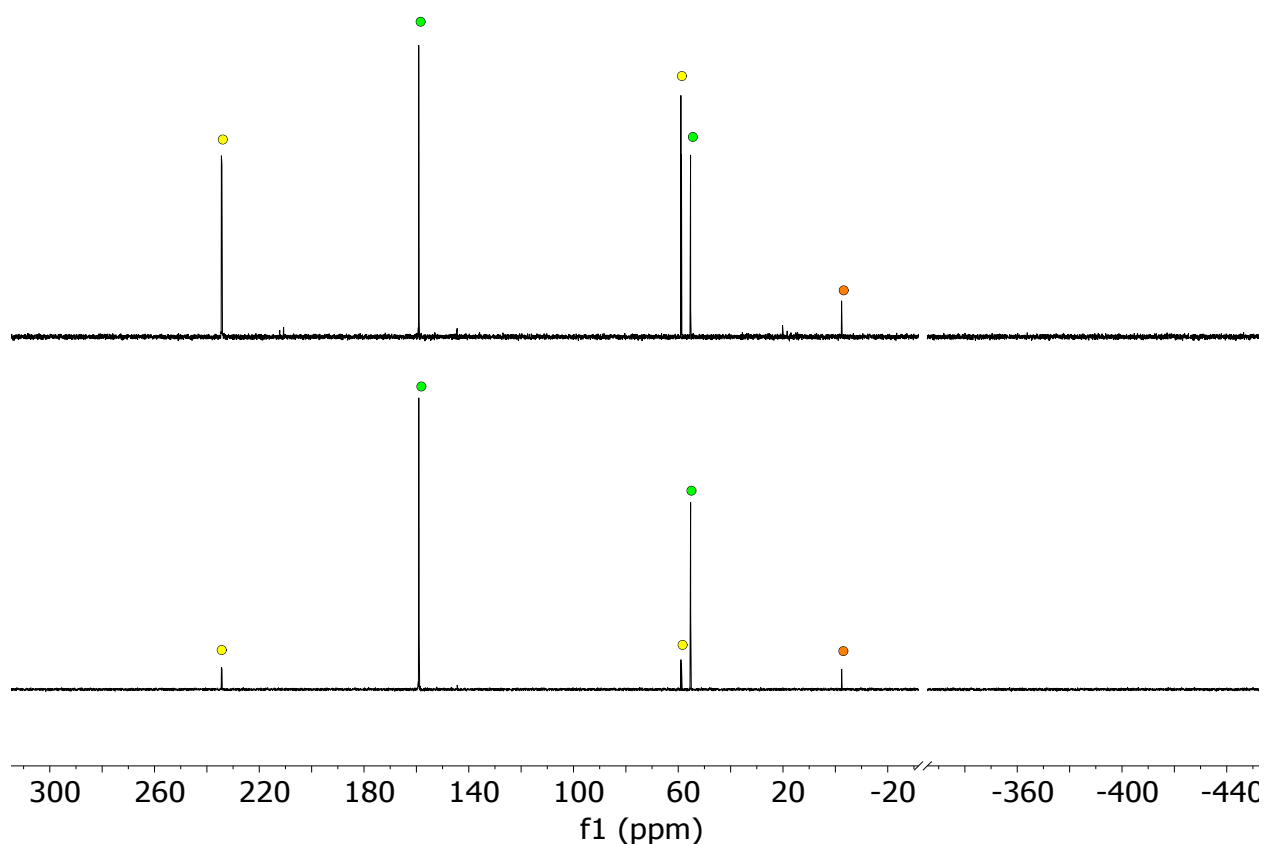

Figure 16. Stacked  $^{31}\text{P}\{^1\text{H}\}$  NMR spectra of *in-situ* formation of (*E*)-**3**/(*Z*)-**3** (THF)

Bottom: 23  $^\circ\text{C}$ , 30 min. Top: 70  $^\circ\text{C}$ , 1 h.

$\text{Me}_3\text{Si-P}(t\text{-Bu})_2$     (*E*)-**3**    (*Z*)-**3**

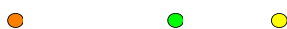

## Reaction of (*E*)-**2** with Ph<sub>2</sub>P-SiPh<sub>3</sub>

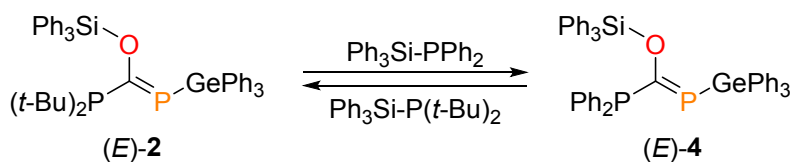

A solution of (*E*)-**2** (18.3 mg, 0.02 mmol, 1 equiv.) in tetrahydrofuran (0.3 mL) was combined with a solution of Ph<sub>2</sub>P-SiPh<sub>3</sub> (9.6 mg, 0.02 mmol, 1 equiv.) in tetrahydrofuran (0.3 mL). The homogenous yellow solution was transferred to an NMR tube and analyzed by <sup>31</sup>P{<sup>1</sup>H} NMR spectroscopy. Analysis after 30 minutes at ambient temperature showed a mixture of exclusively starting materials. Heating the reaction mixture to 85 °C for 1.5 h showed both phosphine exchange and thermal isomerization, both characterized by the formation of (*Z*)-**2**, (*E*)-**4** and (*Z*)-**4**.

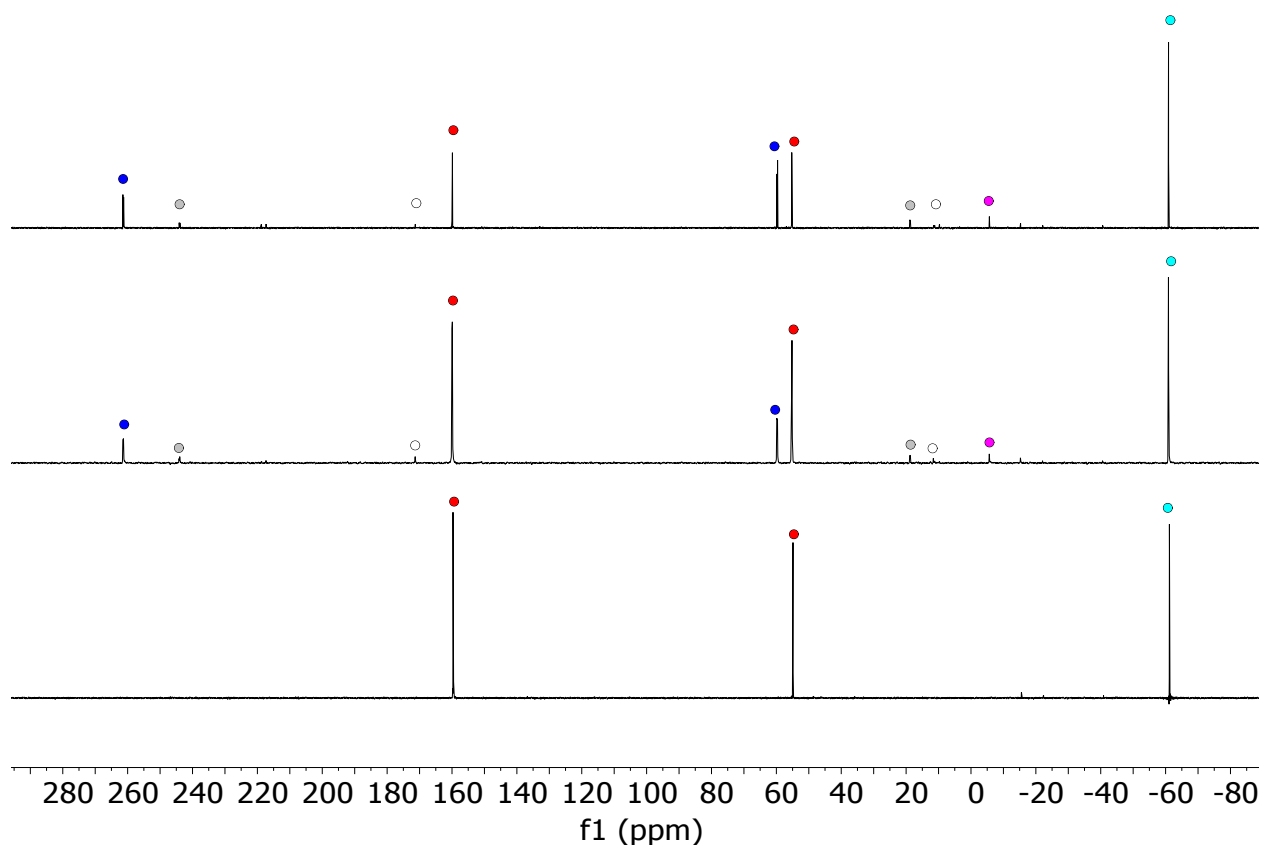

Figure 17. Stacked <sup>31</sup>P{<sup>1</sup>H} NMR spectra of displaying phosphine exchange (THF)

Bottom: 23 °C, 30 min. Middle: 85 °C, 1 h. Top: 85 °C, 2 h.

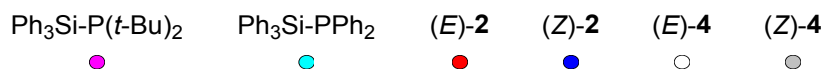

## Independent *in-situ* syntheses and characterization of (*E*)-4/(*Z*)-4

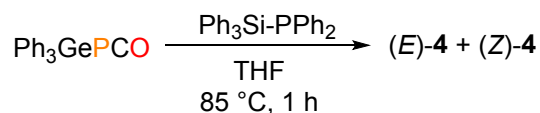

Equimolar solutions of  $\text{Ph}_3\text{GePCO}$  (7.1 mg, 0.02 mmol, 1 equiv.) and  $\text{Ph}_2\text{P-SiPh}_3$  (8.7 mg, 0.02 mmol, 1 equiv.) were combined in tetrahydrofuran (*ca.* 0.6 mL). The pale-yellow reaction mixture was transferred to an NMR tube and analyzed by  $^{31}\text{P}\{^1\text{H}\}$  NMR spectroscopy, which showed trace amounts of (*E*)-4 ( $\delta$  171 ppm, 11 ppm,  $^2J_{\text{PP}} = 16$  Hz). Heating to 85  $^\circ\text{C}$  for 1 hour is accompanied by a colour change to bright yellow and increased formation of both (*E*)-4 and (*Z*)-4 ( $\delta$  244 ppm, 19 ppm,  $^2J_{\text{PP}} = 33$  Hz), consistent with thermal isomerization.

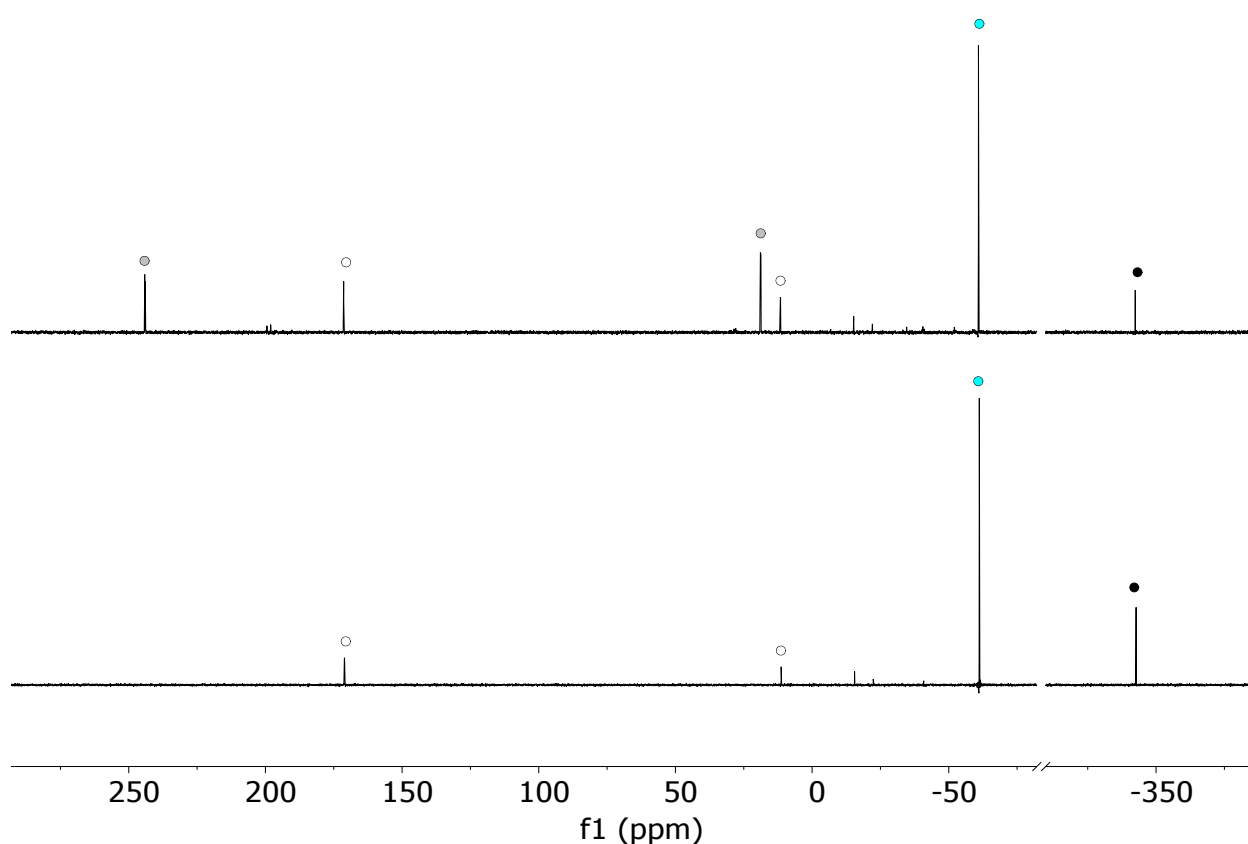

Figure 18. Stacked  $^{31}\text{P}\{^1\text{H}\}$  NMR spectra of *in-situ* formation of (*E*)-4/(*Z*)-4 (THF)

Bottom: 23  $^\circ\text{C}$ , 30 min. Top: 85  $^\circ\text{C}$ , 1 h.

$\text{Ph}_3\text{Si-PPh}_2$     (*E*)-4    (*Z*)-4     $\text{Ph}_3\text{GePCO}$

●

○

●

●

## Reaction of (*E*)-**2** with Ph<sub>2</sub>P-SiMe<sub>3</sub>

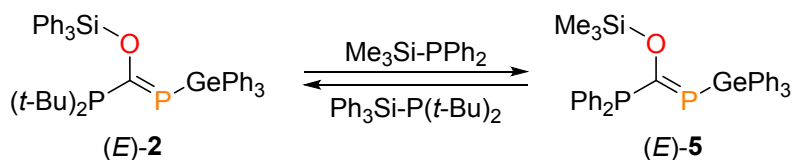

A solution of (*E*)-**2** (24.0 mg, 0.031 mmol, 1 equiv.) in tetrahydrofuran (0.3 mL) was combined with a solution of Ph<sub>2</sub>P-SiMe<sub>3</sub> (8.1 mg, 0.031 mmol, 1 equiv.) in tetrahydrofuran (0.3 mL). The homogenous yellow solution was transferred to an NMR tube and analyzed by <sup>31</sup>P{<sup>1</sup>H} NMR spectroscopy. Analysis after 30 minutes at ambient temperature showed the formation of (*Z*)-**2**, small amounts of (*E*)-**5** (δ 225 ppm, 17 ppm, <sup>2</sup>J<sub>PP</sub> = 31 Hz) and (*Z*)-**5** (δ 159 ppm, 11 ppm, <sup>2</sup>J<sub>PP</sub> = 28 Hz) and *t*-Bu<sub>2</sub>P-SiPh<sub>3</sub>.

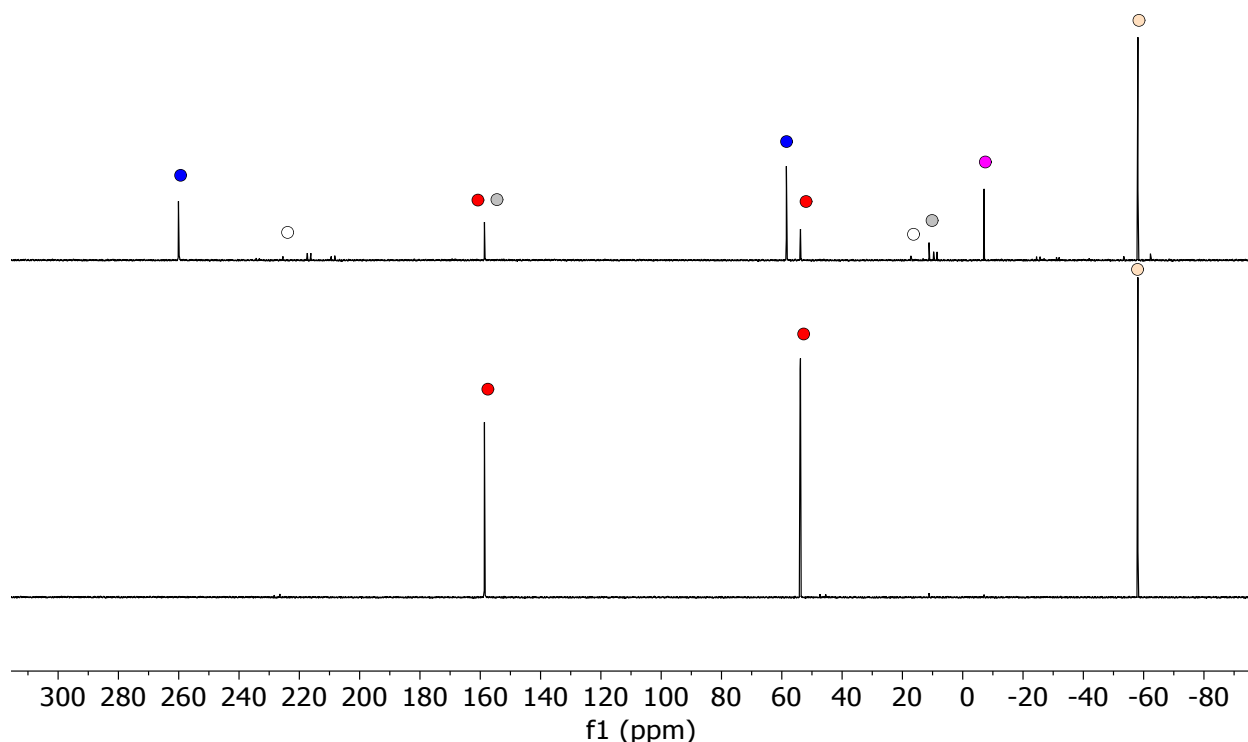

Figure 19. Stacked <sup>31</sup>P{<sup>1</sup>H} NMR spectra of displaying silylphosphine exchange (THF)

Bottom: 23 °C, 30 min. Top: 85 °C, 1.5 h.

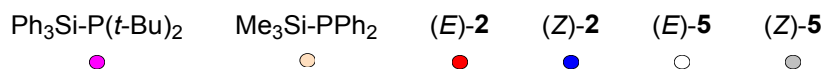

## Independent *in-situ* syntheses and characterization of (*E*)-5/(*Z*)-5

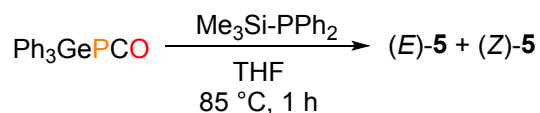

Equimolar solutions of  $\text{Ph}_3\text{GePCO}$  (17.0 mg, 0.047 mmol, 1 equiv.) and  $\text{Ph}_2\text{P-SiMe}_3$  (12.1 mg, 0.047 mmol, 1 equiv.) were combined in tetrahydrofuran (*ca.* 0.6 mL). The pale-yellow reaction mixture was transferred to an NMR tube and analyzed by  $^{31}\text{P}\{^1\text{H}\}$  NMR spectroscopy, which showed the formation of (*E*)-5 and (*Z*)-5. Heating to 85  $^\circ\text{C}$  for 1 hour is accompanied by the appearance of multiple unidentified products.

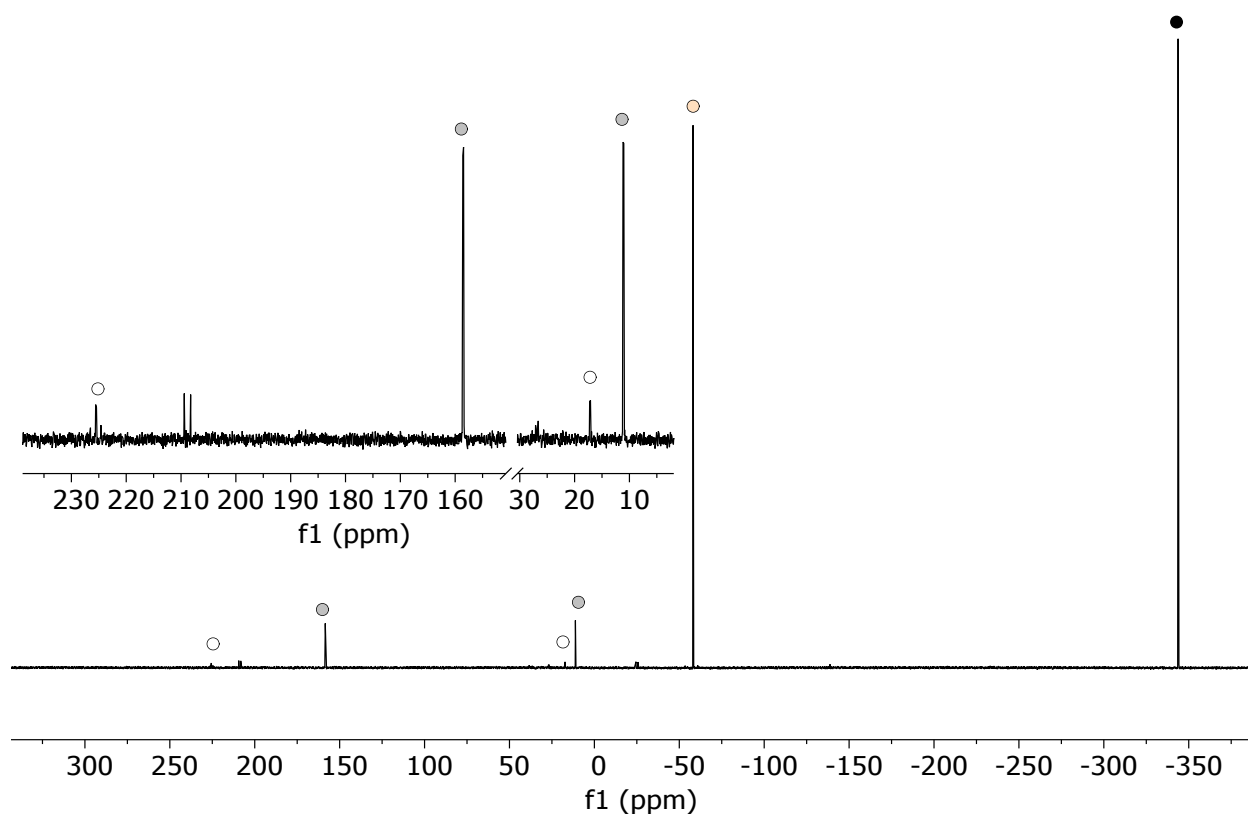

Figure 20.  $^{31}\text{P}\{^1\text{H}\}$  NMR spectrum of *in-situ* formation of (*E*)-5/(*Z*)-5 (THF)

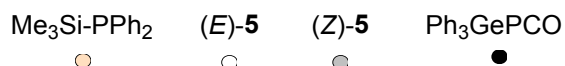



## Computational details

Electronic structure calculations, including geometry optimizations and frequency calculations, were performed using Gaussian 09<sup>3</sup> using an ultrafine grid.<sup>4</sup> The structures of (*E*)-**2** and (*Z*)-**2** were optimized at multiple levels of theory (see below), using the coordinates from the crystal structures as a starting point. All structures were confirmed as minima on the potential energy hypersurface by the absence of any imaginary frequencies.

Calculations were initially carried out by carrying out a geometry optimization and frequency analysis using the  $\omega$ B97X-D functional and the 6-31G\* basis set. Single point energy calculations were subsequently carried out at the  $\omega$ B97X-D/6-311+G\*\* level of theory. These calculations showed that (*E*)-**2** is lower in energy (Table 1).

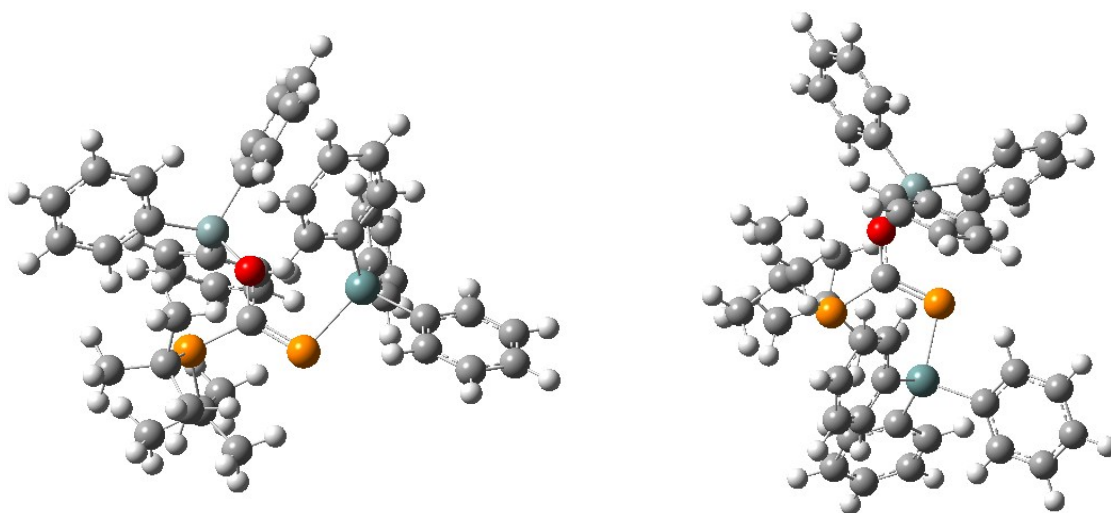

Figure 21. Optimised structures of (*E*)-**2** (left) and (*Z*)-**2** (right) ( $\omega$ B97X-D/6-31G\*).

Table 1. Electronic energies and Gibbs free energy of (*E*)-**2** and (*Z*)-**2**.

|                                                    | ( <i>E</i> )- <b>2</b> | ( <i>Z</i> )- <b>2</b> |
|----------------------------------------------------|------------------------|------------------------|
| Electronic energy (Hartrees)                       | -4868.104533           | -4868.097513           |
| Electronic energy (kcal/mol)                       | -3054779.407           | -3054775.002           |
| <b>Relative electronic energy (kcal/mol)</b>       | <b>0</b>               | <b>+4.4</b>            |
| Thermal correction to Gibbs free energy (Hartrees) | 0.734237               | 0.732010               |
| Thermal correction to Gibbs free energy (kcal/mol) | 460.740                | 459.343                |
| Gibbs free energy (kcal/mol)                       | -3054318.667           | -3054315.659           |
| <b>Relative Gibbs free energy (kcal/mol)</b>       | <b>0</b>               | <b>+3.0</b>            |

The calculations were subsequently carried at alternative and higher levels of theory. In all cases below the geometry optimizations, frequency calculations and single point energies were determined using the following methods:

A)  $\omega$ B97X-D/6-311+G\*\*

B)  $\omega$ B97X-D/6-311+G\*\* with solvent correction (THF)

C) M06-2x/6-311+G\*\* with solvent correction (THF) and Grimme's D3 dispersion correction

The results of these are tabulated in Table 2. Again, in all cases, the Z-isomer is slightly higher in energy than the E-isomer.

Table 2. Electronic energies and Gibbs free energy of (E)-2 and (Z)-2 using methods A, B and C.

|                                              | Method A     |              | Method B     |              | Method C     |              |
|----------------------------------------------|--------------|--------------|--------------|--------------|--------------|--------------|
|                                              | (E)-2        | (Z)-2        | (E)-2        | (Z)-2        | (E)-2        | (Z)-2        |
| Electronic energy (Hartrees)                 | -4868.105011 | -4868.097988 | -4868.114859 | -4868.109711 | -4867.85354  | -4867.850797 |
| Electronic energy (kcal/mol)                 | -3054779.707 | -3054775.300 | -3054785.887 | -3054782.656 | -3054621.907 | -3054620.186 |
| <b>Relative electronic energy (kcal/mol)</b> | <b>0</b>     | <b>+4.4</b>  | <b>0</b>     | <b>+3.2</b>  | <b>0</b>     | <b>+1.7</b>  |
| Gibbs free energy (Hartrees)                 | -4867.379895 | -4867.375553 | -4867.391276 | -4867.386510 | -4867.13016  | -4867.128092 |
| Gibbs free energy (kcal/mol)                 | -3054324.691 | -3054321.966 | -3054331.832 | -3054328.842 | -3054167.98  | -3054166.682 |
| <b>Relative Gibbs free energy (kcal/mol)</b> | <b>0</b>     | <b>+2.7</b>  | <b>0</b>     | <b>+3.0</b>  | <b>0</b>     | <b>+1.30</b> |

Table 3. Cartesian coordinates of optimised structure of (E)-2 ( $\omega$ B97X-D/6-31G\*).

| Center Number | Atomic Number | Atomic Type | Coordinates (Angstroms) |           |           |
|---------------|---------------|-------------|-------------------------|-----------|-----------|
|               |               |             | X                       | Y         | Z         |
| 1             | 32            | 0           | 5.869114                | 5.386343  | 4.270061  |
| 2             | 15            | 0           | 6.663494                | 9.865631  | 2.191998  |
| 3             | 14            | 0           | 4.962580                | 9.785579  | 5.060221  |
| 4             | 15            | 0           | 6.774570                | 6.728057  | 2.591051  |
| 5             | 8             | 0           | 5.329540                | 8.444896  | 4.054555  |
| 6             | 6             | 0           | 6.208132                | 8.267644  | 3.047894  |
| 7             | 6             | 0           | 8.527564                | 9.827471  | 1.834835  |
| 8             | 6             | 0           | 5.629886                | 9.783913  | 0.593778  |
| 9             | 6             | 0           | 4.221804                | 9.302919  | 0.987443  |
| 10            | 6             | 0           | 9.157645                | 8.664730  | 1.057403  |
| 11            | 6             | 0           | 8.839827                | 11.138725 | 1.089564  |
| 12            | 6             | 0           | 9.181615                | 9.890267  | 3.228088  |
| 13            | 6             | 0           | 6.174287                | 8.877034  | -0.513369 |
| 14            | 6             | 0           | 5.498678                | 11.224393 | 0.065526  |
| 15            | 1             | 0           | 3.799359                | 9.885733  | 1.812363  |
| 16            | 1             | 0           | 4.225728                | 8.246823  | 1.271286  |
| 17            | 1             | 0           | 3.554020                | 9.414296  | 0.123764  |
| 18            | 1             | 0           | 10.235494               | 8.854821  | 0.962564  |
| 19            | 1             | 0           | 9.031199                | 7.711288  | 1.573580  |
| 20            | 1             | 0           | 8.752754                | 8.559341  | 0.049491  |
| 21            | 1             | 0           | 8.370588                | 12.007663 | 1.565286  |
| 22            | 1             | 0           | 9.924891                | 11.302161 | 1.088070  |
| 23            | 1             | 0           | 8.516123                | 11.097207 | 0.044274  |
| 24            | 1             | 0           | 8.822495                | 10.741929 | 3.815897  |
| 25            | 1             | 0           | 10.269019               | 9.988008  | 3.113118  |
| 26            | 1             | 0           | 8.987269                | 8.978412  | 3.801689  |
| 27            | 1             | 0           | 6.388857                | 7.867366  | -0.147356 |
| 28            | 1             | 0           | 5.427881                | 8.793816  | -1.314805 |

|    |   |   |          |           |           |
|----|---|---|----------|-----------|-----------|
| 29 | 1 | 0 | 7.084908 | 9.287954  | -0.959835 |
| 30 | 1 | 0 | 5.030667 | 11.877533 | 0.808671  |
| 31 | 1 | 0 | 4.863773 | 11.224140 | -0.830260 |
| 32 | 1 | 0 | 6.462385 | 11.657950 | -0.216033 |
| 33 | 6 | 0 | 6.613218 | 5.856187  | 6.009484  |
| 34 | 6 | 0 | 5.832777 | 6.218749  | 7.110044  |
| 35 | 6 | 0 | 8.007616 | 5.843444  | 6.158576  |
| 36 | 6 | 0 | 6.426441 | 6.568638  | 8.322030  |
| 37 | 1 | 0 | 4.750402 | 6.248971  | 7.025512  |
| 38 | 6 | 0 | 8.605051 | 6.185788  | 7.367731  |
| 39 | 1 | 0 | 8.637196 | 5.561191  | 5.317221  |
| 40 | 6 | 0 | 7.811240 | 6.555401  | 8.452633  |
| 41 | 1 | 0 | 5.798949 | 6.862686  | 9.157651  |
| 42 | 1 | 0 | 9.687339 | 6.167369  | 7.462711  |
| 43 | 1 | 0 | 8.272916 | 6.833064  | 9.395916  |
| 44 | 6 | 0 | 6.478636 | 3.573758  | 3.857014  |
| 45 | 6 | 0 | 6.304302 | 3.058462  | 2.567256  |
| 46 | 6 | 0 | 7.055328 | 2.746282  | 4.825240  |
| 47 | 6 | 0 | 6.694126 | 1.760793  | 2.250840  |
| 48 | 1 | 0 | 5.853992 | 3.678878  | 1.794702  |
| 49 | 6 | 0 | 7.447774 | 1.445188  | 4.516725  |
| 50 | 1 | 0 | 7.205603 | 3.120819  | 5.834856  |
| 51 | 6 | 0 | 7.268417 | 0.950744  | 3.228194  |
| 52 | 1 | 0 | 6.550888 | 1.381482  | 1.242963  |
| 53 | 1 | 0 | 7.894328 | 0.818322  | 5.283667  |
| 54 | 1 | 0 | 7.575242 | -0.062623 | 2.984927  |
| 55 | 6 | 0 | 3.922432 | 5.335849  | 4.274277  |
| 56 | 6 | 0 | 3.248336 | 4.570323  | 5.231034  |
| 57 | 6 | 0 | 3.166025 | 6.003653  | 3.308352  |
| 58 | 6 | 0 | 1.858120 | 4.492032  | 5.237555  |
| 59 | 1 | 0 | 3.812791 | 4.025401  | 5.984660  |
| 60 | 6 | 0 | 1.775495 | 5.927872  | 3.304006  |
| 61 | 1 | 0 | 3.669036 | 6.604789  | 2.556338  |
| 62 | 6 | 0 | 1.118309 | 5.175391  | 4.274987  |
| 63 | 1 | 0 | 1.352478 | 3.896402  | 5.992516  |
| 64 | 1 | 0 | 1.206141 | 6.457974  | 2.545684  |
| 65 | 1 | 0 | 0.033612 | 5.114750  | 4.276607  |
| 66 | 6 | 0 | 6.557284 | 10.425816 | 5.787134  |
| 67 | 6 | 0 | 6.834292 | 11.783664 | 5.993739  |
| 68 | 6 | 0 | 7.502791 | 9.482932  | 6.217105  |
| 69 | 6 | 0 | 8.029850 | 12.187528 | 6.583303  |
| 70 | 1 | 0 | 6.111601 | 12.538217 | 5.695524  |
| 71 | 6 | 0 | 8.694132 | 9.881884  | 6.812891  |
| 72 | 1 | 0 | 7.313039 | 8.422311  | 6.079605  |
| 73 | 6 | 0 | 8.963369 | 11.236719 | 6.989367  |
| 74 | 1 | 0 | 8.231026 | 13.245047 | 6.728998  |
| 75 | 1 | 0 | 9.408863 | 9.130333  | 7.134739  |
| 76 | 1 | 0 | 9.895836 | 11.552429 | 7.448853  |
| 77 | 6 | 0 | 3.906037 | 11.106357 | 4.237395  |
| 78 | 6 | 0 | 4.448837 | 12.205659 | 3.552510  |
| 79 | 6 | 0 | 2.507872 | 11.024167 | 4.327018  |
| 80 | 6 | 0 | 3.632899 | 13.173753 | 2.976420  |
| 81 | 1 | 0 | 5.525316 | 12.289095 | 3.443796  |
| 82 | 6 | 0 | 1.685759 | 11.979719 | 3.733844  |
| 83 | 1 | 0 | 2.046503 | 10.206743 | 4.873185  |
| 84 | 6 | 0 | 2.246950 | 13.057583 | 3.057300  |
| 85 | 1 | 0 | 4.080195 | 14.015572 | 2.455208  |
| 86 | 1 | 0 | 0.606446 | 11.884237 | 3.808948  |
| 87 | 1 | 0 | 1.608558 | 13.807255 | 2.598505  |
| 88 | 6 | 0 | 3.956258 | 8.984101  | 6.419534  |
| 89 | 6 | 0 | 4.236528 | 9.285885  | 7.758909  |
| 90 | 6 | 0 | 2.903390 | 8.097357  | 6.151048  |
| 91 | 6 | 0 | 3.497584 | 8.718801  | 8.794331  |
| 92 | 1 | 0 | 5.056099 | 9.957340  | 8.001405  |
| 93 | 6 | 0 | 2.162781 | 7.526250  | 7.181812  |
| 94 | 1 | 0 | 2.666658 | 7.824713  | 5.127044  |
| 95 | 6 | 0 | 2.462379 | 7.833249  | 8.507276  |
| 96 | 1 | 0 | 3.735564 | 8.963610  | 9.825857  |
| 97 | 1 | 0 | 1.362727 | 6.832246  | 6.944191  |
| 98 | 1 | 0 | 1.888953 | 7.384770  | 9.313779  |

Table 4. Cartesian coordinates of optimised structure of (Z)-2 ( $\omega$ B97X-D/6-31G\*).

| Center<br>Number | Atomic<br>Number | Atomic<br>Type | Coordinates (Angstroms) |           |           |
|------------------|------------------|----------------|-------------------------|-----------|-----------|
|                  |                  |                | X                       | Y         | Z         |
| 1                | 32               | 0              | 2.509873                | 8.919275  | 2.698094  |
| 2                | 15               | 0              | 1.595891                | 5.570601  | 2.750857  |
| 3                | 15               | 0              | 1.115233                | 8.181538  | 4.422494  |
| 4                | 14               | 0              | 0.733367                | 6.077388  | 7.002157  |
| 5                | 8                | 0              | 0.723222                | 5.718665  | 5.335678  |
| 6                | 6                | 0              | 2.649166                | 10.834499 | 3.097688  |
| 7                | 6                | 0              | 2.510573                | 4.013789  | 3.335112  |
| 8                | 6                | 0              | 0.484740                | 4.387936  | 7.759436  |
| 9                | 6                | 0              | 1.858696                | 8.727394  | 0.871356  |
| 10               | 6                | 0              | -0.696363               | 7.201034  | 7.421836  |
| 11               | 6                | 0              | -0.613181               | 2.218011  | 7.713142  |
| 12               | 1                | 0              | -1.270434               | 1.511602  | 7.214474  |
| 13               | 6                | 0              | 1.145595                | 6.477854  | 4.298874  |
| 14               | 6                | 0              | 2.379689                | 6.818973  | 7.493593  |
| 15               | 6                | 0              | 4.309384                | 8.209347  | 2.957705  |
| 16               | 6                | 0              | 2.541406                | 8.204879  | 7.648587  |
| 17               | 1                | 0              | 1.681560                | 8.860878  | 7.544907  |
| 18               | 6                | 0              | -0.147891               | 5.115987  | 2.119123  |
| 19               | 6                | 0              | -0.367326               | 3.461128  | 7.139966  |
| 20               | 1                | 0              | -0.839453               | 3.713540  | 6.193374  |
| 21               | 6                | 0              | 0.790376                | 9.521850  | 0.441312  |
| 22               | 1                | 0              | 0.367175                | 10.266615 | 1.111779  |
| 23               | 6                | 0              | 3.513340                | 6.004238  | 7.630181  |
| 24               | 1                | 0              | 3.420824                | 4.925723  | 7.525770  |
| 25               | 6                | 0              | 2.369915                | 7.772331  | -0.013483 |
| 26               | 1                | 0              | 3.173178                | 7.116563  | 0.308468  |
| 27               | 6                | 0              | 3.625560                | 4.522481  | 4.263801  |
| 28               | 1                | 0              | 4.265230                | 5.255840  | 3.764230  |
| 29               | 1                | 0              | 3.224993                | 4.986947  | 5.168125  |
| 30               | 1                | 0              | 4.256856                | 3.678042  | 4.570669  |
| 31               | 6                | 0              | -1.751178               | 7.415567  | 6.525753  |
| 32               | 1                | 0              | -1.714112               | 6.975137  | 5.532689  |
| 33               | 6                | 0              | 4.738683                | 7.808487  | 4.227690  |
| 34               | 1                | 0              | 4.044603                | 7.805202  | 5.064685  |
| 35               | 6                | 0              | 3.791096                | 8.756379  | 7.914573  |
| 36               | 1                | 0              | 3.896894                | 9.832020  | 8.020967  |
| 37               | 6                | 0              | 0.004927                | 4.065731  | 1.007211  |
| 38               | 1                | 0              | 0.747733                | 4.372737  | 0.261882  |
| 39               | 1                | 0              | 0.288535                | 3.084300  | 1.398974  |
| 40               | 1                | 0              | -0.955654               | 3.946738  | 0.489586  |
| 41               | 6                | 0              | 1.838980                | 7.621975  | -1.291663 |
| 42               | 1                | 0              | 2.251065                | 6.874516  | -1.963870 |
| 43               | 6                | 0              | -0.016530               | 1.881103  | 8.926413  |
| 44               | 1                | 0              | -0.206684               | 0.910364  | 9.375212  |
| 45               | 6                | 0              | 3.193052                | 3.412294  | 2.090881  |
| 46               | 1                | 0              | 3.795476                | 4.162046  | 1.566067  |
| 47               | 1                | 0              | 3.862814                | 2.600266  | 2.403340  |
| 48               | 1                | 0              | 2.477055                | 2.991317  | 1.379518  |
| 49               | 6                | 0              | -0.722055               | 6.393376  | 1.482323  |
| 50               | 1                | 0              | -0.123537               | 6.723968  | 0.629245  |
| 51               | 1                | 0              | -1.740569               | 6.190447  | 1.125641  |
| 52               | 1                | 0              | -0.778125               | 7.219293  | 2.199178  |
| 53               | 6                | 0              | -0.769950               | 7.797218  | 8.688467  |
| 54               | 1                | 0              | 0.034944                | 7.649223  | 9.406154  |
| 55               | 6                | 0              | 1.710935                | 2.924487  | 4.056678  |
| 56               | 1                | 0              | 1.214037                | 3.311961  | 4.948000  |
| 57               | 1                | 0              | 0.959399                | 2.465172  | 3.406940  |
| 58               | 1                | 0              | 2.394616                | 2.125052  | 4.373668  |
| 59               | 6                | 0              | 0.247708                | 9.371096  | -0.832535 |
| 60               | 1                | 0              | -0.587044               | 9.993002  | -1.142895 |
| 61               | 6                | 0              | 2.980323                | 13.555380 | 3.731228  |
| 62               | 1                | 0              | 3.105167                | 14.606519 | 3.975721  |

|    |   |   |           |           |           |
|----|---|---|-----------|-----------|-----------|
| 63 | 6 | 0 | 2.781329  | 11.255671 | 4.426672  |
| 64 | 1 | 0 | 2.764816  | 10.522357 | 5.230889  |
| 65 | 6 | 0 | 5.239007  | 8.195385  | 1.911961  |
| 66 | 1 | 0 | 4.945293  | 8.528166  | 0.919443  |
| 67 | 6 | 0 | -2.895486 | 8.791905  | 8.140594  |
| 68 | 1 | 0 | -3.744668 | 9.410473  | 8.416532  |
| 69 | 6 | 0 | 0.773687  | 8.420226  | -1.702927 |
| 70 | 1 | 0 | 0.352938  | 8.298901  | -2.697060 |
| 71 | 6 | 0 | 4.906442  | 7.929821  | 8.033764  |
| 72 | 1 | 0 | 5.883433  | 8.360563  | 8.233120  |
| 73 | 6 | 0 | 0.821432  | 2.791680  | 9.563288  |
| 74 | 1 | 0 | 1.286390  | 2.534193  | 10.510568 |
| 75 | 6 | 0 | 6.049527  | 7.392602  | 4.443857  |
| 76 | 1 | 0 | 6.353758  | 7.082777  | 5.439434  |
| 77 | 6 | 0 | -1.141367 | 4.610033  | 3.174070  |
| 78 | 1 | 0 | -1.358880 | 5.380765  | 3.918565  |
| 79 | 1 | 0 | -2.086887 | 4.347494  | 2.680443  |
| 80 | 1 | 0 | -0.781824 | 3.725132  | 3.703045  |
| 81 | 6 | 0 | 1.067491  | 4.034167  | 8.983515  |
| 82 | 1 | 0 | 1.728776  | 4.732495  | 9.491498  |
| 83 | 6 | 0 | -2.841557 | 8.204057  | 6.879295  |
| 84 | 1 | 0 | -3.646769 | 8.364673  | 6.168443  |
| 85 | 6 | 0 | 6.955867  | 7.363204  | 3.387640  |
| 86 | 1 | 0 | 7.977097  | 7.031042  | 3.552187  |
| 87 | 6 | 0 | 2.697175  | 11.806647 | 2.093621  |
| 88 | 1 | 0 | 2.607869  | 11.511333 | 1.051184  |
| 89 | 6 | 0 | 2.944587  | 12.600513 | 4.744625  |
| 90 | 1 | 0 | 3.043012  | 12.904120 | 5.783241  |
| 91 | 6 | 0 | -1.857990 | 8.587860  | 9.046757  |
| 92 | 1 | 0 | -1.895748 | 9.045609  | 10.031016 |
| 93 | 6 | 0 | 6.548360  | 7.768272  | 2.119340  |
| 94 | 1 | 0 | 7.251189  | 7.757494  | 1.290924  |
| 95 | 6 | 0 | 2.859329  | 13.155436 | 2.403730  |
| 96 | 1 | 0 | 2.892486  | 13.893376 | 1.606932  |
| 97 | 6 | 0 | 4.765985  | 6.551374  | 7.896815  |
| 98 | 1 | 0 | 5.630810  | 5.901564  | 7.995152  |

Table 5. Cartesian coordinates of optimised structure of (*E*)-**2** ( $\omega$ B97X-D/6-311+G\*\*; Method A).

| Center<br>Number | Atomic<br>Number | Atomic<br>Type | Coordinates (Angstroms) |           |           |
|------------------|------------------|----------------|-------------------------|-----------|-----------|
|                  |                  |                | X                       | Y         | Z         |
| 1                | 32               | 0              | 5.856535                | 5.387387  | 4.252425  |
| 2                | 15               | 0              | 6.672232                | 9.868557  | 2.199846  |
| 3                | 14               | 0              | 4.968359                | 9.785716  | 5.079295  |
| 4                | 15               | 0              | 6.745306                | 6.734868  | 2.565679  |
| 5                | 8                | 0              | 5.352214                | 8.449792  | 4.078814  |
| 6                | 6                | 0              | 6.204752                | 8.270808  | 3.052106  |
| 7                | 6                | 0              | 8.538945                | 9.818259  | 1.863056  |
| 8                | 6                | 0              | 5.658396                | 9.796189  | 0.590135  |
| 9                | 6                | 0              | 4.243078                | 9.331125  | 0.970551  |
| 10               | 6                | 0              | 9.165798                | 8.648399  | 1.097536  |
| 11               | 6                | 0              | 8.867038                | 11.123372 | 1.117539  |
| 12               | 6                | 0              | 9.176237                | 9.879676  | 3.262001  |
| 13               | 6                | 0              | 6.206236                | 8.884829  | -0.509277 |
| 14               | 6                | 0              | 5.550529                | 11.236300 | 0.059734  |
| 15               | 1                | 0              | 3.821015                | 9.918368  | 1.790017  |
| 16               | 1                | 0              | 4.233779                | 8.277272  | 1.254013  |
| 17               | 1                | 0              | 3.586380                | 9.450526  | 0.102046  |
| 18               | 1                | 0              | 10.243610               | 8.831583  | 1.010821  |
| 19               | 1                | 0              | 9.030514                | 7.701004  | 1.618156  |
| 20               | 1                | 0              | 8.768911                | 8.539475  | 0.089229  |
| 21               | 1                | 0              | 8.396478                | 11.994421 | 1.583393  |
| 22               | 1                | 0              | 9.950953                | 11.280108 | 1.130988  |
| 23               | 1                | 0              | 8.557460                | 11.078779 | 0.070416  |

|    |   |   |           |           |           |
|----|---|---|-----------|-----------|-----------|
| 24 | 1 | 0 | 8.814447  | 10.732757 | 3.842374  |
| 25 | 1 | 0 | 10.263232 | 9.971708  | 3.158988  |
| 26 | 1 | 0 | 8.970575  | 8.971398  | 3.833644  |
| 27 | 1 | 0 | 6.401301  | 7.873365  | -0.143969 |
| 28 | 1 | 0 | 5.470361  | 8.814227  | -1.318971 |
| 29 | 1 | 0 | 7.126407  | 9.284509  | -0.940818 |
| 30 | 1 | 0 | 5.089357  | 11.896220 | 0.797849  |
| 31 | 1 | 0 | 4.920112  | 11.242076 | -0.836740 |
| 32 | 1 | 0 | 6.519569  | 11.654351 | -0.218052 |
| 33 | 6 | 0 | 6.622093  | 5.863109  | 5.986975  |
| 34 | 6 | 0 | 5.848090  | 6.190219  | 7.100346  |
| 35 | 6 | 0 | 8.016440  | 5.874852  | 6.116738  |
| 36 | 6 | 0 | 6.450002  | 6.525676  | 8.310077  |
| 37 | 1 | 0 | 4.765874  | 6.204639  | 7.030179  |
| 38 | 6 | 0 | 8.619536  | 6.205019  | 7.323765  |
| 39 | 1 | 0 | 8.642289  | 5.624252  | 5.264634  |
| 40 | 6 | 0 | 7.833849  | 6.534718  | 8.424086  |
| 41 | 1 | 0 | 5.829645  | 6.790916  | 9.158519  |
| 42 | 1 | 0 | 9.701360  | 6.207290  | 7.405160  |
| 43 | 1 | 0 | 8.300741  | 6.800672  | 9.366189  |
| 44 | 6 | 0 | 6.453152  | 3.564142  | 3.837778  |
| 45 | 6 | 0 | 6.201165  | 3.025499  | 2.572307  |
| 46 | 6 | 0 | 7.092698  | 2.761777  | 4.784705  |
| 47 | 6 | 0 | 6.578482  | 1.725379  | 2.259916  |
| 48 | 1 | 0 | 5.700794  | 3.625086  | 1.816402  |
| 49 | 6 | 0 | 7.471239  | 1.458230  | 4.476662  |
| 50 | 1 | 0 | 7.300949  | 3.153789  | 5.775511  |
| 51 | 6 | 0 | 7.215617  | 0.938570  | 3.213916  |
| 52 | 1 | 0 | 6.375739  | 1.325003  | 1.272462  |
| 53 | 1 | 0 | 7.966351  | 0.848652  | 5.225034  |
| 54 | 1 | 0 | 7.511269  | -0.076592 | 2.972459  |
| 55 | 6 | 0 | 3.903346  | 5.346045  | 4.261874  |
| 56 | 6 | 0 | 3.225769  | 4.562754  | 5.198815  |
| 57 | 6 | 0 | 3.157028  | 6.042473  | 3.311213  |
| 58 | 6 | 0 | 1.837208  | 4.494970  | 5.198996  |
| 59 | 1 | 0 | 3.782776  | 3.996015  | 5.939549  |
| 60 | 6 | 0 | 1.768231  | 5.972955  | 3.302023  |
| 61 | 1 | 0 | 3.664347  | 6.660090  | 2.577757  |
| 62 | 6 | 0 | 1.105556  | 5.203185  | 4.251832  |
| 63 | 1 | 0 | 1.325814  | 3.886605  | 5.937362  |
| 64 | 1 | 0 | 1.204111  | 6.523536  | 2.556838  |
| 65 | 1 | 0 | 0.022257  | 5.149567  | 4.249574  |
| 66 | 6 | 0 | 6.555370  | 10.455820 | 5.798616  |
| 67 | 6 | 0 | 6.825965  | 11.816939 | 5.970836  |
| 68 | 6 | 0 | 7.498201  | 9.529264  | 6.259698  |
| 69 | 6 | 0 | 8.013769  | 12.238766 | 6.558253  |
| 70 | 1 | 0 | 6.104903  | 12.560680 | 5.649158  |
| 71 | 6 | 0 | 8.681900  | 9.946268  | 6.852473  |
| 72 | 1 | 0 | 7.310733  | 8.466019  | 6.152587  |
| 73 | 6 | 0 | 8.945346  | 11.303678 | 6.995689  |
| 74 | 1 | 0 | 8.210381  | 13.298597 | 6.678151  |
| 75 | 1 | 0 | 9.395842  | 9.207081  | 7.198505  |
| 76 | 1 | 0 | 9.871871  | 11.633689 | 7.452965  |
| 77 | 6 | 0 | 3.889386  | 11.076901 | 4.239124  |
| 78 | 6 | 0 | 4.413132  | 12.169884 | 3.535597  |
| 79 | 6 | 0 | 2.495467  | 10.970342 | 4.328170  |
| 80 | 6 | 0 | 3.582344  | 13.110442 | 2.941841  |
| 81 | 1 | 0 | 5.486224  | 12.266096 | 3.421976  |
| 82 | 6 | 0 | 1.658871  | 11.898051 | 3.716705  |
| 83 | 1 | 0 | 2.047609  | 10.156124 | 4.886850  |
| 84 | 6 | 0 | 2.200976  | 12.971579 | 3.022781  |
| 85 | 1 | 0 | 4.013941  | 13.948452 | 2.405009  |
| 86 | 1 | 0 | 0.582995  | 11.784627 | 3.791313  |
| 87 | 1 | 0 | 1.551130  | 13.699854 | 2.549911  |
| 88 | 6 | 0 | 3.978915  | 8.982716  | 6.451302  |
| 89 | 6 | 0 | 4.257213  | 9.302143  | 7.784432  |
| 90 | 6 | 0 | 2.936539  | 8.084521  | 6.194530  |
| 91 | 6 | 0 | 3.527399  | 8.738614  | 8.825065  |
| 92 | 1 | 0 | 5.067655  | 9.985061  | 8.018773  |
| 93 | 6 | 0 | 2.204372  | 7.518546  | 7.230385  |
| 94 | 1 | 0 | 2.701894  | 7.798791  | 5.175687  |

|    |   |   |          |          |          |
|----|---|---|----------|----------|----------|
| 95 | 6 | 0 | 2.501789 | 7.842331 | 8.549859 |
| 96 | 1 | 0 | 3.764599 | 8.995834 | 9.851868 |
| 97 | 1 | 0 | 1.411473 | 6.815691 | 7.002015 |
| 98 | 1 | 0 | 1.934944 | 7.397497 | 9.360688 |

Table 6. Cartesian coordinates of optimised structure of (Z)-2 ( $\omega$ B97X-D/6-311+G\*\*; Method A).

| Center<br>Number | Atomic<br>Number | Atomic<br>Type | Coordinates (Angstroms) |           |           |
|------------------|------------------|----------------|-------------------------|-----------|-----------|
|                  |                  |                | X                       | Y         | Z         |
| 1                | 32               | 0              | 2.517651                | 8.930367  | 2.700652  |
| 2                | 15               | 0              | 1.594793                | 5.585849  | 2.759065  |
| 3                | 15               | 0              | 1.142659                | 8.186174  | 4.443384  |
| 4                | 14               | 0              | 0.737791                | 6.064188  | 7.019586  |
| 5                | 8                | 0              | 0.743475                | 5.727156  | 5.350906  |
| 6                | 6                | 0              | 2.647002                | 10.859320 | 3.069098  |
| 7                | 6                | 0              | 2.523289                | 4.032311  | 3.327823  |
| 8                | 6                | 0              | 0.482810                | 4.368332  | 7.758868  |
| 9                | 6                | 0              | 1.854466                | 8.730632  | 0.872593  |
| 10               | 6                | 0              | -0.698418               | 7.180209  | 7.438225  |
| 11               | 6                | 0              | -0.631474               | 2.213006  | 7.691761  |
| 12               | 1                | 0              | -1.295395               | 1.518797  | 7.188492  |
| 13               | 6                | 0              | 1.162906                | 6.485921  | 4.314615  |
| 14               | 6                | 0              | 2.382020                | 6.800436  | 7.522273  |
| 15               | 6                | 0              | 4.323615                | 8.218546  | 2.960000  |
| 16               | 6                | 0              | 2.541744                | 8.179403  | 7.708179  |
| 17               | 1                | 0              | 1.682338                | 8.835711  | 7.620418  |
| 18               | 6                | 0              | -0.154886               | 5.125273  | 2.150924  |
| 19               | 6                | 0              | -0.376480               | 3.457621  | 7.131873  |
| 20               | 1                | 0              | -0.846542               | 3.722973  | 6.189779  |
| 21               | 6                | 0              | 0.804224                | 9.545211  | 0.442514  |
| 22               | 1                | 0              | 0.400439                | 10.304960 | 1.105537  |
| 23               | 6                | 0              | 3.514364                | 5.984447  | 7.632397  |
| 24               | 1                | 0              | 3.422946                | 4.910610  | 7.500102  |
| 25               | 6                | 0              | 2.346652                | 7.762478  | -0.005375 |
| 26               | 1                | 0              | 3.134326                | 7.091440  | 0.317369  |
| 27               | 6                | 0              | 3.656447                | 4.548311  | 4.227727  |
| 28               | 1                | 0              | 4.278362                | 5.281935  | 3.710236  |
| 29               | 1                | 0              | 3.279264                | 5.012280  | 5.139795  |
| 30               | 1                | 0              | 4.298076                | 3.708604  | 4.518393  |
| 31               | 6                | 0              | -1.731018               | 7.419537  | 6.527122  |
| 32               | 1                | 0              | -1.674108               | 7.006615  | 5.525101  |
| 33               | 6                | 0              | 4.760049                | 7.856705  | 4.237379  |
| 34               | 1                | 0              | 4.075450                | 7.882259  | 5.080173  |
| 35               | 6                | 0              | 3.789977                | 8.724290  | 7.982276  |
| 36               | 1                | 0              | 3.896262                | 9.795450  | 8.112689  |
| 37               | 6                | 0              | -0.010679               | 4.080066  | 1.035209  |
| 38               | 1                | 0              | 0.723756                | 4.389081  | 0.285412  |
| 39               | 1                | 0              | 0.276408                | 3.099993  | 1.421737  |
| 40               | 1                | 0              | -0.974607               | 3.963648  | 0.527587  |
| 41               | 6                | 0              | 1.809637                | 7.616621  | -1.279062 |
| 42               | 1                | 0              | 2.204340                | 6.858938  | -1.947516 |
| 43               | 6                | 0              | -0.035330               | 1.858085  | 8.897451  |
| 44               | 1                | 0              | -0.232719               | 0.885951  | 9.335761  |
| 45               | 6                | 0              | 3.179016                | 3.425031  | 2.074029  |
| 46               | 1                | 0              | 3.765399                | 4.172059  | 1.531601  |
| 47               | 1                | 0              | 3.858291                | 2.620675  | 2.378790  |
| 48               | 1                | 0              | 2.450907                | 2.995877  | 1.383812  |
| 49               | 6                | 0              | -0.742457               | 6.401929  | 1.528608  |
| 50               | 1                | 0              | -0.151667               | 6.746042  | 0.677872  |
| 51               | 1                | 0              | -1.758260               | 6.191449  | 1.174922  |
| 52               | 1                | 0              | -0.804141               | 7.218946  | 2.251983  |
| 53               | 6                | 0              | -0.798620               | 7.739967  | 8.716803  |
| 54               | 1                | 0              | -0.012854               | 7.569972  | 9.448148  |
| 55               | 6                | 0              | 1.737637                | 2.948835  | 4.069791  |
| 56               | 1                | 0              | 1.252050                | 3.342570  | 4.961761  |
| 57               | 1                | 0              | 0.980504                | 2.483240  | 3.434825  |

|    |   |   |           |           |           |
|----|---|---|-----------|-----------|-----------|
| 58 | 1 | 0 | 2.427379  | 2.155998  | 4.383585  |
| 59 | 6 | 0 | 0.255220  | 9.394504  | -0.826361 |
| 60 | 1 | 0 | -0.566892 | 10.029292 | -1.138434 |
| 61 | 6 | 0 | 2.995016  | 13.589809 | 3.619980  |
| 62 | 1 | 0 | 3.127177  | 14.645095 | 3.832531  |
| 63 | 6 | 0 | 2.657141  | 11.331267 | 4.385154  |
| 64 | 1 | 0 | 2.530507  | 10.639036 | 5.212898  |
| 65 | 6 | 0 | 5.238706  | 8.163544  | 1.905716  |
| 66 | 1 | 0 | 4.939644  | 8.464855  | 0.906686  |
| 67 | 6 | 0 | -2.907391 | 8.751116  | 8.150482  |
| 68 | 1 | 0 | -3.760522 | 9.362030  | 8.424391  |
| 69 | 6 | 0 | 0.759193  | 8.429903  | -1.690779 |
| 70 | 1 | 0 | 0.333248  | 8.310060  | -2.680931 |
| 71 | 6 | 0 | 4.904167  | 7.897577  | 8.076837  |
| 72 | 1 | 0 | 5.879941  | 8.324131  | 8.282189  |
| 73 | 6 | 0 | 0.811563  | 2.752459  | 9.540068  |
| 74 | 1 | 0 | 1.276437  | 2.480594  | 10.481361 |
| 75 | 6 | 0 | 6.067785  | 7.438437  | 4.451970  |
| 76 | 1 | 0 | 6.380588  | 7.158562  | 5.451932  |
| 77 | 6 | 0 | -1.130398 | 4.609388  | 3.215334  |
| 78 | 1 | 0 | -1.339994 | 5.371937  | 3.967054  |
| 79 | 1 | 0 | -2.079348 | 4.348272  | 2.731810  |
| 80 | 1 | 0 | -0.761064 | 3.723027  | 3.730242  |
| 81 | 6 | 0 | 1.066306  | 3.997338  | 8.974402  |
| 82 | 1 | 0 | 1.733915  | 4.683138  | 9.487567  |
| 83 | 6 | 0 | -2.826772 | 8.198189  | 6.877687  |
| 84 | 1 | 0 | -3.615334 | 8.378256  | 6.155525  |
| 85 | 6 | 0 | 6.961507  | 7.367534  | 3.389946  |
| 86 | 1 | 0 | 7.980096  | 7.033359  | 3.554754  |
| 87 | 6 | 0 | 2.822226  | 11.783187 | 2.035526  |
| 88 | 1 | 0 | 2.824506  | 11.447744 | 1.002901  |
| 89 | 6 | 0 | 2.827651  | 12.683221 | 4.660429  |
| 90 | 1 | 0 | 2.829022  | 13.029682 | 5.688433  |
| 91 | 6 | 0 | -1.891488 | 8.521322  | 9.071503  |
| 92 | 1 | 0 | -1.950856 | 8.951035  | 10.065376 |
| 93 | 6 | 0 | 6.544707  | 7.732883  | 2.115194  |
| 94 | 1 | 0 | 7.238434  | 7.688962  | 1.282440  |
| 95 | 6 | 0 | 2.993887  | 13.136749 | 2.306163  |
| 96 | 1 | 0 | 3.127842  | 13.837913 | 1.489366  |
| 97 | 6 | 0 | 4.765156  | 6.525380  | 7.905493  |
| 98 | 1 | 0 | 5.630113  | 5.875584  | 7.981304  |

Table 7. Cartesian coordinates of optimised structure of (*E*)-**2** ( $\omega$ B97X-D/6-311+G\*\*, THF; Method B).

| Center<br>Number | Atomic<br>Number | Atomic<br>Type | Coordinates (Angstroms) |           |           |
|------------------|------------------|----------------|-------------------------|-----------|-----------|
|                  |                  |                | X                       | Y         | Z         |
| 1                | 32               | 0              | 5.854285                | 5.384577  | 4.259484  |
| 2                | 15               | 0              | 6.677482                | 9.870642  | 2.205660  |
| 3                | 14               | 0              | 4.970644                | 9.788171  | 5.084340  |
| 4                | 15               | 0              | 6.743866                | 6.731972  | 2.574062  |
| 5                | 8                | 0              | 5.359645                | 8.448936  | 4.086129  |
| 6                | 6                | 0              | 6.208529                | 8.271898  | 3.057962  |
| 7                | 6                | 0              | 8.542584                | 9.816931  | 1.861526  |
| 8                | 6                | 0              | 5.657393                | 9.805229  | 0.599862  |
| 9                | 6                | 0              | 4.242055                | 9.342298  | 0.982529  |
| 10               | 6                | 0              | 9.165606                | 8.643003  | 1.098994  |
| 11               | 6                | 0              | 8.868460                | 11.117956 | 1.107575  |
| 12               | 6                | 0              | 9.187433                | 9.883358  | 3.256702  |
| 13               | 6                | 0              | 6.200033                | 8.896818  | -0.504514 |
| 14               | 6                | 0              | 5.552503                | 11.247466 | 0.074219  |
| 15               | 1                | 0              | 3.823316                | 9.931469  | 1.802272  |
| 16               | 1                | 0              | 4.229949                | 8.288883  | 1.268030  |
| 17               | 1                | 0              | 3.585196                | 9.461494  | 0.114352  |
| 18               | 1                | 0              | 10.241010               | 8.831553  | 0.997128  |
| 19               | 1                | 0              | 9.042069                | 7.701248  | 1.633002  |
| 20               | 1                | 0              | 8.755883                | 8.522380  | 0.097139  |



|    |   |   |           |           |           |
|----|---|---|-----------|-----------|-----------|
| 21 | 1 | 0 | 8.399566  | 11.992127 | 1.569282  |
| 22 | 1 | 0 | 9.952474  | 11.273492 | 1.117647  |
| 23 | 1 | 0 | 8.555810  | 11.067271 | 0.061839  |
| 24 | 1 | 0 | 8.827418  | 10.738240 | 3.835704  |
| 25 | 1 | 0 | 10.273669 | 9.975535  | 3.146837  |
| 26 | 1 | 0 | 8.984110  | 8.977523  | 3.833346  |
| 27 | 1 | 0 | 6.387453  | 7.881945  | -0.144361 |
| 28 | 1 | 0 | 5.463283  | 8.836248  | -1.314003 |
| 29 | 1 | 0 | 7.123049  | 9.292546  | -0.933253 |
| 30 | 1 | 0 | 5.105796  | 11.909209 | 0.819682  |
| 31 | 1 | 0 | 4.911013  | 11.257977 | -0.814140 |
| 32 | 1 | 0 | 6.520756  | 11.659188 | -0.214970 |
| 33 | 6 | 0 | 6.620224  | 5.855023  | 5.995245  |
| 34 | 6 | 0 | 5.843870  | 6.180603  | 7.107872  |
| 35 | 6 | 0 | 8.014711  | 5.872479  | 6.126265  |
| 36 | 6 | 0 | 6.443280  | 6.518252  | 8.318751  |
| 37 | 1 | 0 | 4.761737  | 6.192347  | 7.036004  |
| 38 | 6 | 0 | 8.615884  | 6.206924  | 7.333613  |
| 39 | 1 | 0 | 8.643714  | 5.626204  | 5.275223  |
| 40 | 6 | 0 | 7.827698  | 6.533437  | 8.433739  |
| 41 | 1 | 0 | 5.821983  | 6.782567  | 9.167031  |
| 42 | 1 | 0 | 9.697431  | 6.218305  | 7.414871  |
| 43 | 1 | 0 | 8.293128  | 6.803232  | 9.375410  |
| 44 | 6 | 0 | 6.450942  | 3.561787  | 3.831566  |
| 45 | 6 | 0 | 6.191091  | 3.029014  | 2.564185  |
| 46 | 6 | 0 | 7.099596  | 2.754353  | 4.768958  |
| 47 | 6 | 0 | 6.569073  | 1.730541  | 2.240951  |
| 48 | 1 | 0 | 5.683779  | 3.630835  | 1.814561  |
| 49 | 6 | 0 | 7.479079  | 1.452603  | 4.450861  |
| 50 | 1 | 0 | 7.314298  | 3.140158  | 5.760814  |
| 51 | 6 | 0 | 7.215224  | 0.939001  | 3.186209  |
| 52 | 1 | 0 | 6.359785  | 1.335555  | 1.252673  |
| 53 | 1 | 0 | 7.980820  | 0.839883  | 5.192201  |
| 54 | 1 | 0 | 7.511126  | -0.074156 | 2.936915  |
| 55 | 6 | 0 | 3.901143  | 5.344605  | 4.266872  |
| 56 | 6 | 0 | 3.218559  | 4.582599  | 5.218564  |
| 57 | 6 | 0 | 3.158683  | 6.029532  | 3.304155  |
| 58 | 6 | 0 | 1.828961  | 4.524770  | 5.220999  |
| 59 | 1 | 0 | 3.770322  | 4.028560  | 5.972760  |
| 60 | 6 | 0 | 1.768880  | 5.970551  | 3.297678  |
| 61 | 1 | 0 | 3.668851  | 6.629617  | 2.558155  |
| 62 | 6 | 0 | 1.101388  | 5.222322  | 4.262086  |
| 63 | 1 | 0 | 1.313628  | 3.937121  | 5.973061  |
| 64 | 1 | 0 | 1.207814  | 6.513590  | 2.544794  |
| 65 | 1 | 0 | 0.017727  | 5.179778  | 4.264321  |
| 66 | 6 | 0 | 6.558706  | 10.457084 | 5.803879  |
| 67 | 6 | 0 | 6.826555  | 11.817366 | 5.989330  |
| 68 | 6 | 0 | 7.506223  | 9.528644  | 6.252521  |
| 69 | 6 | 0 | 8.015658  | 12.236730 | 6.577401  |
| 70 | 1 | 0 | 6.103824  | 12.563953 | 5.678491  |
| 71 | 6 | 0 | 8.691282  | 9.942369  | 6.846039  |
| 72 | 1 | 0 | 7.320909  | 8.465736  | 6.135873  |
| 73 | 6 | 0 | 8.951753  | 11.299610 | 7.002569  |
| 74 | 1 | 0 | 8.209584  | 13.295833 | 6.707176  |
| 75 | 1 | 0 | 9.409702  | 9.202733  | 7.182202  |
| 76 | 1 | 0 | 9.878766  | 11.627370 | 7.460321  |
| 77 | 6 | 0 | 3.889278  | 11.068552 | 4.232617  |
| 78 | 6 | 0 | 4.408724  | 12.179574 | 3.554542  |
| 79 | 6 | 0 | 2.495572  | 10.928102 | 4.276479  |
| 80 | 6 | 0 | 3.574626  | 13.106802 | 2.943366  |
| 81 | 1 | 0 | 5.481537  | 12.305171 | 3.474019  |
| 82 | 6 | 0 | 1.655969  | 11.841787 | 3.647328  |
| 83 | 1 | 0 | 2.048480  | 10.096065 | 4.808977  |
| 84 | 6 | 0 | 2.194500  | 12.935102 | 2.980072  |
| 85 | 1 | 0 | 4.003002  | 13.958780 | 2.426695  |
| 86 | 1 | 0 | 0.581397  | 11.701551 | 3.685640  |
| 87 | 1 | 0 | 1.542788  | 13.652192 | 2.493087  |
| 88 | 6 | 0 | 3.981007  | 8.986610  | 6.458328  |
| 89 | 6 | 0 | 4.258665  | 9.314233  | 7.790283  |
| 90 | 6 | 0 | 2.940382  | 8.083888  | 6.208000  |
| 91 | 6 | 0 | 3.531912  | 8.754737  | 8.835784  |

|    |   |   |          |           |          |
|----|---|---|----------|-----------|----------|
| 92 | 1 | 0 | 5.066640 | 10.001230 | 8.021401 |
| 93 | 6 | 0 | 2.209186 | 7.523724  | 7.248393 |
| 94 | 1 | 0 | 2.706192 | 7.789895  | 5.191245 |
| 95 | 6 | 0 | 2.506817 | 7.855276  | 8.566426 |
| 96 | 1 | 0 | 3.772056 | 9.015585  | 9.860821 |
| 97 | 1 | 0 | 1.416506 | 6.818456  | 7.026473 |
| 98 | 1 | 0 | 1.942119 | 7.413100  | 9.380083 |

Table 8. Cartesian coordinates of optimised structure of (Z)-2 ( $\omega$ B97X-D/6-311+G\*\*, THF; Method B).

| Center<br>Number | Atomic<br>Number | Atomic<br>Type | Coordinates (Angstroms) |           |           |
|------------------|------------------|----------------|-------------------------|-----------|-----------|
|                  |                  |                | X                       | Y         | Z         |
| 1                | 32               | 0              | 2.505768                | 8.925122  | 2.695827  |
| 2                | 15               | 0              | 1.604306                | 5.549092  | 2.762130  |
| 3                | 15               | 0              | 1.122153                | 8.164501  | 4.420425  |
| 4                | 14               | 0              | 0.748485                | 6.071650  | 7.020162  |
| 5                | 8                | 0              | 0.747899                | 5.712604  | 5.351746  |
| 6                | 6                | 0              | 2.629413                | 10.848148 | 3.106888  |
| 7                | 6                | 0              | 2.507373                | 3.987210  | 3.348857  |
| 8                | 6                | 0              | 0.470246                | 4.385748  | 7.773591  |
| 9                | 6                | 0              | 1.853328                | 8.740745  | 0.864133  |
| 10               | 6                | 0              | -0.682124               | 7.203827  | 7.418931  |
| 11               | 6                | 0              | -0.669344               | 2.241884  | 7.721528  |
| 12               | 1                | 0              | -1.337822               | 1.549987  | 7.221182  |
| 13               | 6                | 0              | 1.159486                | 6.461145  | 4.309137  |
| 14               | 6                | 0              | 2.402235                | 6.798670  | 7.501742  |
| 15               | 6                | 0              | 4.323548                | 8.237784  | 2.947311  |
| 16               | 6                | 0              | 2.583844                | 8.179824  | 7.652306  |
| 17               | 1                | 0              | 1.735884                | 8.849053  | 7.554730  |
| 18               | 6                | 0              | -0.142395               | 5.103259  | 2.133811  |
| 19               | 6                | 0              | -0.395750               | 3.478110  | 7.149845  |
| 20               | 1                | 0              | -0.856926               | 3.737676  | 6.201688  |
| 21               | 6                | 0              | 0.769232                | 9.517340  | 0.446419  |
| 22               | 1                | 0              | 0.327129                | 10.243383 | 1.122598  |
| 23               | 6                | 0              | 3.524048                | 5.969201  | 7.626974  |
| 24               | 1                | 0              | 3.419137                | 4.893589  | 7.523405  |
| 25               | 6                | 0              | 2.388164                | 7.809730  | -0.029023 |
| 26               | 1                | 0              | 3.207492                | 7.170570  | 0.280191  |
| 27               | 6                | 0              | 3.637454                | 4.491122  | 4.259261  |
| 28               | 1                | 0              | 4.271950                | 5.217386  | 3.746350  |
| 29               | 1                | 0              | 3.256506                | 4.959490  | 5.167253  |
| 30               | 1                | 0              | 4.266111                | 3.644354  | 4.556942  |
| 31               | 6                | 0              | -1.753148               | 7.357333  | 6.532332  |
| 32               | 1                | 0              | -1.728117               | 6.867550  | 5.564126  |
| 33               | 6                | 0              | 4.752575                | 7.801140  | 4.203881  |
| 34               | 1                | 0              | 4.054296                | 7.745050  | 5.033906  |
| 35               | 6                | 0              | 3.841484                | 8.713570  | 7.906734  |
| 36               | 1                | 0              | 3.962715                | 9.785983  | 8.011109  |
| 37               | 6                | 0              | 0.001114                | 4.040159  | 1.034807  |
| 38               | 1                | 0              | 0.749612                | 4.325961  | 0.289637  |
| 39               | 1                | 0              | 0.267433                | 3.061301  | 1.438086  |
| 40               | 1                | 0              | -0.958614               | 3.932071  | 0.517750  |
| 41               | 6                | 0              | 1.859063                | 7.662148  | -1.306605 |
| 42               | 1                | 0              | 2.285564                | 6.932500  | -1.986439 |
| 43               | 6                | 0              | -0.084656               | 1.892924  | 8.935525  |
| 44               | 1                | 0              | -0.295813               | 0.927765  | 9.382626  |
| 45               | 6                | 0              | 3.167489                | 3.362520  | 2.105793  |
| 46               | 1                | 0              | 3.767423                | 4.097580  | 1.561548  |
| 47               | 1                | 0              | 3.834221                | 2.553296  | 2.424692  |
| 48               | 1                | 0              | 2.440698                | 2.935903  | 1.412960  |
| 49               | 6                | 0              | -0.704736               | 6.377965  | 1.485890  |
| 50               | 1                | 0              | -0.092997               | 6.704479  | 0.642718  |
| 51               | 1                | 0              | -1.716152               | 6.173155  | 1.116986  |
| 52               | 1                | 0              | -0.769645               | 7.204521  | 2.198131  |
| 53               | 6                | 0              | -0.745623               | 7.856553  | 8.655564  |
| 54               | 1                | 0              | 0.068338                | 7.754390  | 9.367940  |

|    |   |   |           |           |           |
|----|---|---|-----------|-----------|-----------|
| 55 | 6 | 0 | 1.699431  | 2.918472  | 4.088839  |
| 56 | 1 | 0 | 1.210067  | 3.325401  | 4.972829  |
| 57 | 1 | 0 | 0.942568  | 2.459120  | 3.449539  |
| 58 | 1 | 0 | 2.377079  | 2.119625  | 4.413463  |
| 59 | 6 | 0 | 0.230591  | 9.367452  | -0.827371 |
| 60 | 1 | 0 | -0.616617 | 9.972727  | -1.130806 |
| 61 | 6 | 0 | 2.964805  | 13.565076 | 3.738082  |
| 62 | 1 | 0 | 3.092102  | 14.614263 | 3.981381  |
| 63 | 6 | 0 | 2.743348  | 11.269652 | 4.436533  |
| 64 | 1 | 0 | 2.707076  | 10.543528 | 5.244378  |
| 65 | 6 | 0 | 5.256602  | 8.287486  | 1.907191  |
| 66 | 1 | 0 | 4.962343  | 8.644928  | 0.925151  |
| 67 | 6 | 0 | -2.892935 | 8.791585  | 8.094631  |
| 68 | 1 | 0 | -3.745966 | 9.408840  | 8.354046  |
| 69 | 6 | 0 | 0.776472  | 8.438984  | -1.707262 |
| 70 | 1 | 0 | 0.357809  | 8.318611  | -2.700426 |
| 71 | 6 | 0 | 4.944590  | 7.873062  | 8.015564  |
| 72 | 1 | 0 | 5.927744  | 8.289654  | 8.204863  |
| 73 | 6 | 0 | 0.768955  | 2.784862  | 9.574642  |
| 74 | 1 | 0 | 1.224838  | 2.517672  | 10.521563 |
| 75 | 6 | 0 | 6.071713  | 7.413243  | 4.412361  |
| 76 | 1 | 0 | 6.379980  | 7.074253  | 5.395420  |
| 77 | 6 | 0 | -1.136579 | 4.616510  | 3.194356  |
| 78 | 1 | 0 | -1.343191 | 5.393380  | 3.932114  |
| 79 | 1 | 0 | -2.083425 | 4.362661  | 2.703437  |
| 80 | 1 | 0 | -0.786376 | 3.732302  | 3.725853  |
| 81 | 6 | 0 | 1.041646  | 4.021416  | 8.997589  |
| 82 | 1 | 0 | 1.712601  | 4.704829  | 9.509270  |
| 83 | 6 | 0 | -2.849547 | 8.144234  | 6.863965  |
| 84 | 1 | 0 | -3.667900 | 8.255931  | 6.161381  |
| 85 | 6 | 0 | 6.984432  | 7.449427  | 3.363998  |
| 86 | 1 | 0 | 8.011647  | 7.140208  | 3.523668  |
| 87 | 6 | 0 | 2.695411  | 11.815790 | 2.100645  |
| 88 | 1 | 0 | 2.618679  | 11.521701 | 1.058475  |
| 89 | 6 | 0 | 2.908085  | 12.614120 | 4.752131  |
| 90 | 1 | 0 | 2.992524  | 12.919563 | 5.789560  |
| 91 | 6 | 0 | -1.839646 | 8.646600  | 8.991486  |
| 92 | 1 | 0 | -1.869850 | 9.149450  | 9.951733  |
| 93 | 6 | 0 | 6.574441  | 7.888804  | 2.109443  |
| 94 | 1 | 0 | 7.281788  | 7.926496  | 1.287959  |
| 95 | 6 | 0 | 2.860386  | 13.162981 | 2.411122  |
| 96 | 1 | 0 | 2.908422  | 13.898402 | 1.615143  |
| 97 | 6 | 0 | 4.784593  | 6.498643  | 7.879223  |
| 98 | 1 | 0 | 5.640614  | 5.838739  | 7.966002  |

Table 9. Cartesian coordinates of optimised structure of (*E*)-**2** (M06-2x/6-311+G\*\*, THF, GD3; Method C).

| Center Number | Atomic Number | Atomic Type | Coordinates (Angstroms) |           |           |
|---------------|---------------|-------------|-------------------------|-----------|-----------|
|               |               |             | X                       | Y         | Z         |
| 1             | 32            | 0           | 5.825412                | 5.400003  | 4.236093  |
| 2             | 15            | 0           | 6.688527                | 9.875496  | 2.235535  |
| 3             | 14            | 0           | 4.939987                | 9.736998  | 5.087909  |
| 4             | 15            | 0           | 6.738742                | 6.727036  | 2.533882  |
| 5             | 8             | 0           | 5.345299                | 8.407275  | 4.088245  |
| 6             | 6             | 0           | 6.203440                | 8.256748  | 3.054466  |
| 7             | 6             | 0           | 8.559976                | 9.801783  | 1.925563  |
| 8             | 6             | 0           | 5.717105                | 9.821376  | 0.598151  |
| 9             | 6             | 0           | 4.295558                | 9.345376  | 0.933554  |
| 10            | 6             | 0           | 9.199891                | 8.604761  | 1.212893  |
| 11            | 6             | 0           | 8.902753                | 11.079490 | 1.140662  |
| 12            | 6             | 0           | 9.182637                | 9.904193  | 3.327147  |
| 13            | 6             | 0           | 6.295545                | 8.932293  | -0.502287 |
| 14            | 6             | 0           | 5.618104                | 11.269756 | 0.090684  |
| 15            | 1             | 0           | 3.856687                | 9.912326  | 1.759398  |

|    |   |   |           |           |           |
|----|---|---|-----------|-----------|-----------|
| 16 | 1 | 0 | 4.284287  | 8.284780  | 1.188731  |
| 17 | 1 | 0 | 3.661610  | 9.487768  | 0.052428  |
| 18 | 1 | 0 | 10.255430 | 8.842921  | 1.037744  |
| 19 | 1 | 0 | 9.162748  | 7.705692  | 1.825771  |
| 20 | 1 | 0 | 8.744913  | 8.381586  | 0.249527  |
| 21 | 1 | 0 | 8.418788  | 11.965008 | 1.562905  |
| 22 | 1 | 0 | 9.985327  | 11.235817 | 1.179372  |
| 23 | 1 | 0 | 8.620299  | 10.994053 | 0.089128  |
| 24 | 1 | 0 | 8.819499  | 10.777838 | 3.876314  |
| 25 | 1 | 0 | 10.270748 | 9.982103  | 3.228809  |
| 26 | 1 | 0 | 8.959286  | 9.014178  | 3.921222  |
| 27 | 1 | 0 | 6.461029  | 7.909666  | -0.154438 |
| 28 | 1 | 0 | 5.585626  | 8.894541  | -1.336241 |
| 29 | 1 | 0 | 7.235277  | 9.330501  | -0.889436 |
| 30 | 1 | 0 | 5.142182  | 11.913776 | 0.833356  |
| 31 | 1 | 0 | 5.004185  | 11.285735 | -0.816160 |
| 32 | 1 | 0 | 6.591489  | 11.692473 | -0.160134 |
| 33 | 6 | 0 | 6.637423  | 5.879130  | 5.958031  |
| 34 | 6 | 0 | 5.901999  | 6.215019  | 7.097474  |
| 35 | 6 | 0 | 8.038126  | 5.897014  | 6.036269  |
| 36 | 6 | 0 | 6.549404  | 6.566255  | 8.282840  |
| 37 | 1 | 0 | 4.816575  | 6.222876  | 7.067544  |
| 38 | 6 | 0 | 8.686203  | 6.246626  | 7.216217  |
| 39 | 1 | 0 | 8.632790  | 5.640298  | 5.163227  |
| 40 | 6 | 0 | 7.938600  | 6.585688  | 8.343135  |
| 41 | 1 | 0 | 5.962267  | 6.834913  | 9.153527  |
| 42 | 1 | 0 | 9.769644  | 6.259079  | 7.256392  |
| 43 | 1 | 0 | 8.439079  | 6.865926  | 9.263015  |
| 44 | 6 | 0 | 6.402617  | 3.560422  | 3.817665  |
| 45 | 6 | 0 | 6.157674  | 3.033957  | 2.543288  |
| 46 | 6 | 0 | 7.029431  | 2.744064  | 4.764091  |
| 47 | 6 | 0 | 6.526796  | 1.731131  | 2.222144  |
| 48 | 1 | 0 | 5.670758  | 3.646118  | 1.788178  |
| 49 | 6 | 0 | 7.400263  | 1.437722  | 4.448165  |
| 50 | 1 | 0 | 7.233381  | 3.127276  | 5.759372  |
| 51 | 6 | 0 | 7.149923  | 0.930316  | 3.176947  |
| 52 | 1 | 0 | 6.330215  | 1.340532  | 1.230200  |
| 53 | 1 | 0 | 7.884247  | 0.817739  | 5.194319  |
| 54 | 1 | 0 | 7.439046  | -0.084608 | 2.929671  |
| 55 | 6 | 0 | 3.864260  | 5.411637  | 4.250042  |
| 56 | 6 | 0 | 3.158616  | 4.678526  | 5.209775  |
| 57 | 6 | 0 | 3.142536  | 6.115955  | 3.282700  |
| 58 | 6 | 0 | 1.765914  | 4.668814  | 5.215790  |
| 59 | 1 | 0 | 3.694571  | 4.110830  | 5.965905  |
| 60 | 6 | 0 | 1.750086  | 6.103927  | 3.278956  |
| 61 | 1 | 0 | 3.673722  | 6.694253  | 2.534068  |
| 62 | 6 | 0 | 1.059863  | 5.385625  | 4.252718  |
| 63 | 1 | 0 | 1.232084  | 4.104859  | 5.972519  |
| 64 | 1 | 0 | 1.205326  | 6.659415  | 2.523779  |
| 65 | 1 | 0 | -0.024077 | 5.379819  | 4.257875  |
| 66 | 6 | 0 | 6.520143  | 10.444727 | 5.787975  |
| 67 | 6 | 0 | 6.772966  | 11.812011 | 5.951303  |
| 68 | 6 | 0 | 7.474626  | 9.530745  | 6.255871  |
| 69 | 6 | 0 | 7.958570  | 12.253093 | 6.534265  |
| 70 | 1 | 0 | 6.041012  | 12.544894 | 5.629782  |
| 71 | 6 | 0 | 8.656275  | 9.967208  | 6.845562  |
| 72 | 1 | 0 | 7.295664  | 8.463242  | 6.157843  |
| 73 | 6 | 0 | 8.903573  | 11.331076 | 6.977530  |
| 74 | 1 | 0 | 8.142229  | 13.315352 | 6.647065  |
| 75 | 1 | 0 | 9.381372  | 9.241416  | 7.196873  |
| 76 | 1 | 0 | 9.825928  | 11.675417 | 7.431082  |
| 77 | 6 | 0 | 3.832206  | 10.988110 | 4.226394  |
| 78 | 6 | 0 | 4.326691  | 12.104900 | 3.536168  |
| 79 | 6 | 0 | 2.441494  | 10.809410 | 4.265576  |
| 80 | 6 | 0 | 3.469072  | 13.001571 | 2.907691  |
| 81 | 1 | 0 | 5.396663  | 12.259535 | 3.461837  |
| 82 | 6 | 0 | 1.579790  | 11.691436 | 3.617907  |
| 83 | 1 | 0 | 2.015071  | 9.973319  | 4.808353  |
| 84 | 6 | 0 | 2.092720  | 12.790995 | 2.938319  |
| 85 | 1 | 0 | 3.875708  | 13.858973 | 2.383244  |
| 86 | 1 | 0 | 0.509822  | 11.522476 | 3.651976  |

|    |   |   |          |           |          |
|----|---|---|----------|-----------|----------|
| 87 | 1 | 0 | 1.424789 | 13.482776 | 2.438240 |
| 88 | 6 | 0 | 3.984670 | 8.939274  | 6.490573 |
| 89 | 6 | 0 | 4.313428 | 9.266867  | 7.813027 |
| 90 | 6 | 0 | 2.932843 | 8.035914  | 6.279700 |
| 91 | 6 | 0 | 3.624995 | 8.709138  | 8.887092 |
| 92 | 1 | 0 | 5.130682 | 9.952483  | 8.013043 |
| 93 | 6 | 0 | 2.238250 | 7.480105  | 7.349981 |
| 94 | 1 | 0 | 2.659517 | 7.740338  | 5.272186 |
| 95 | 6 | 0 | 2.586682 | 7.812140  | 8.657061 |
| 96 | 1 | 0 | 3.904152 | 8.970317  | 9.901627 |
| 97 | 1 | 0 | 1.433149 | 6.779919  | 7.160476 |
| 98 | 1 | 0 | 2.050576 | 7.373741  | 9.491037 |

Table 10. Cartesian coordinates of optimised structure of (Z)-2 (M06-2x/6-311+G\*\*, THF, GD3; Method C).

| Center<br>Number | Atomic<br>Number | Atomic<br>Type | Coordinates (Angstroms) |           |           |
|------------------|------------------|----------------|-------------------------|-----------|-----------|
|                  |                  |                | X                       | Y         | Z         |
| 1                | 32               | 0              | 2.498290                | 8.917254  | 2.704566  |
| 2                | 15               | 0              | 1.599112                | 5.580376  | 2.741196  |
| 3                | 15               | 0              | 1.106787                | 8.172297  | 4.445717  |
| 4                | 14               | 0              | 0.762817                | 6.053167  | 7.005287  |
| 5                | 8                | 0              | 0.733036                | 5.695998  | 5.338713  |
| 6                | 6                | 0              | 2.596681                | 10.853112 | 3.098209  |
| 7                | 6                | 0              | 2.480660                | 4.005671  | 3.324463  |
| 8                | 6                | 0              | 0.501956                | 4.371278  | 7.771671  |
| 9                | 6                | 0              | 1.872635                | 8.712308  | 0.857114  |
| 10               | 6                | 0              | -0.656422               | 7.190843  | 7.427005  |
| 11               | 6                | 0              | -0.649443               | 2.231685  | 7.741322  |
| 12               | 1                | 0              | -1.330008               | 1.542208  | 7.255397  |
| 13               | 6                | 0              | 1.144528                | 6.468656  | 4.305384  |
| 14               | 6                | 0              | 2.414685                | 6.791730  | 7.480315  |
| 15               | 6                | 0              | 4.315674                | 8.216630  | 2.986743  |
| 16               | 6                | 0              | 2.578186                | 8.175284  | 7.642998  |
| 17               | 1                | 0              | 1.720504                | 8.832794  | 7.543039  |
| 18               | 6                | 0              | -0.149216               | 5.148882  | 2.111994  |
| 19               | 6                | 0              | -0.380042               | 3.467149  | 7.162809  |
| 20               | 1                | 0              | -0.856594               | 3.731988  | 6.222911  |
| 21               | 6                | 0              | 0.806470                | 9.499301  | 0.409274  |
| 22               | 1                | 0              | 0.366382                | 10.243076 | 1.068006  |
| 23               | 6                | 0              | 3.544264                | 5.971731  | 7.611282  |
| 24               | 1                | 0              | 3.449302                | 4.895255  | 7.502245  |
| 25               | 6                | 0              | 2.408873                | 7.757847  | -0.013267 |
| 26               | 1                | 0              | 3.211978                | 7.110403  | 0.322512  |
| 27               | 6                | 0              | 3.610563                | 4.504878  | 4.236773  |
| 28               | 1                | 0              | 4.266443                | 5.201751  | 3.709559  |
| 29               | 1                | 0              | 3.226545                | 5.008930  | 5.125427  |
| 30               | 1                | 0              | 4.212843                | 3.650188  | 4.563463  |
| 31               | 6                | 0              | -1.709186               | 7.407091  | 6.530703  |
| 32               | 1                | 0              | -1.672755               | 6.964411  | 5.540103  |
| 33               | 6                | 0              | 4.737496                | 7.791818  | 4.252424  |
| 34               | 1                | 0              | 4.036126                | 7.752769  | 5.083068  |
| 35               | 6                | 0              | 3.829007                | 8.722036  | 7.912682  |
| 36               | 1                | 0              | 3.937909                | 9.794274  | 8.027817  |
| 37               | 6                | 0              | -0.012732               | 4.074460  | 1.024821  |
| 38               | 1                | 0              | 0.744263                | 4.346933  | 0.283144  |
| 39               | 1                | 0              | 0.238404                | 3.096987  | 1.439096  |
| 40               | 1                | 0              | -0.971198               | 3.977567  | 0.504243  |
| 41               | 6                | 0              | 1.898223                | 7.597960  | -1.298382 |
| 42               | 1                | 0              | 2.324993                | 6.853168  | -1.960564 |
| 43               | 6                | 0              | -0.043354               | 1.882206  | 8.946251  |
| 44               | 1                | 0              | -0.250758               | 0.919163  | 9.398157  |
| 45               | 6                | 0              | 3.142041                | 3.377517  | 2.084921  |
| 46               | 1                | 0              | 3.739626                | 4.113572  | 1.539926  |
| 47               | 1                | 0              | 3.810591                | 2.573554  | 2.411040  |

|    |   |   |           |           |           |
|----|---|---|-----------|-----------|-----------|
| 48 | 1 | 0 | 2.416424  | 2.945863  | 1.394896  |
| 49 | 6 | 0 | -0.697176 | 6.421640  | 1.450110  |
| 50 | 1 | 0 | -0.087552 | 6.723549  | 0.595663  |
| 51 | 1 | 0 | -1.714962 | 6.223970  | 1.096412  |
| 52 | 1 | 0 | -0.740844 | 7.258912  | 2.151717  |
| 53 | 6 | 0 | -0.725809 | 7.785351  | 8.693473  |
| 54 | 1 | 0 | 0.076363  | 7.632013  | 9.410636  |
| 55 | 6 | 0 | 1.665665  | 2.941374  | 4.062141  |
| 56 | 1 | 0 | 1.187756  | 3.348574  | 4.952534  |
| 57 | 1 | 0 | 0.901655  | 2.492333  | 3.424915  |
| 58 | 1 | 0 | 2.341425  | 2.136937  | 4.375415  |
| 59 | 6 | 0 | 0.283577  | 9.334925  | -0.871332 |
| 60 | 1 | 0 | -0.549919 | 9.946008  | -1.198096 |
| 61 | 6 | 0 | 2.880343  | 13.581025 | 3.714402  |
| 62 | 1 | 0 | 2.986921  | 14.633239 | 3.951582  |
| 63 | 6 | 0 | 2.664414  | 11.287964 | 4.428048  |
| 64 | 1 | 0 | 2.611177  | 10.567100 | 5.240263  |
| 65 | 6 | 0 | 5.252307  | 8.241014  | 1.946438  |
| 66 | 1 | 0 | 4.962493  | 8.589904  | 0.959767  |
| 67 | 6 | 0 | -2.847927 | 8.787155  | 8.144954  |
| 68 | 1 | 0 | -3.693211 | 9.406914  | 8.420717  |
| 69 | 6 | 0 | 0.831030  | 8.383828  | -1.727803 |
| 70 | 1 | 0 | 0.426455  | 8.253153  | -2.724833 |
| 71 | 6 | 0 | 4.941398  | 7.891429  | 8.024585  |
| 72 | 1 | 0 | 5.917732  | 8.317158  | 8.226417  |
| 73 | 6 | 0 | 0.826011  | 2.771481  | 9.570358  |
| 74 | 1 | 0 | 1.296468  | 2.502808  | 10.508975 |
| 75 | 6 | 0 | 6.054129  | 7.391713  | 4.467516  |
| 76 | 1 | 0 | 6.358987  | 7.063601  | 5.454967  |
| 77 | 6 | 0 | -1.144156 | 4.687746  | 3.180945  |
| 78 | 1 | 0 | -1.356670 | 5.489734  | 3.889860  |
| 79 | 1 | 0 | -2.085707 | 4.413337  | 2.691877  |
| 80 | 1 | 0 | -0.788316 | 3.825347  | 3.743493  |
| 81 | 6 | 0 | 1.094602  | 4.007417  | 8.986637  |
| 82 | 1 | 0 | 1.776096  | 4.690493  | 9.484658  |
| 83 | 6 | 0 | -2.797544 | 8.198586  | 6.884027  |
| 84 | 1 | 0 | -3.602473 | 8.359833  | 6.176470  |
| 85 | 6 | 0 | 6.968703  | 7.401237  | 3.418179  |
| 86 | 1 | 0 | 7.991032  | 7.081375  | 3.583677  |
| 87 | 6 | 0 | 2.682882  | 11.813005 | 2.083983  |
| 88 | 1 | 0 | 2.642862  | 11.507558 | 1.042939  |
| 89 | 6 | 0 | 2.804137  | 12.638356 | 4.736505  |
| 90 | 1 | 0 | 2.853139  | 12.954591 | 5.772343  |
| 91 | 6 | 0 | -1.810933 | 8.580280  | 9.050898  |
| 92 | 1 | 0 | -1.847431 | 9.037758  | 10.032676 |
| 93 | 6 | 0 | 6.566221  | 7.828070  | 2.155594  |
| 94 | 1 | 0 | 7.274775  | 7.845025  | 1.335324  |
| 95 | 6 | 0 | 2.822410  | 13.166085 | 2.387252  |
| 96 | 1 | 0 | 2.886555  | 13.895035 | 1.587349  |
| 97 | 6 | 0 | 4.798349  | 6.514550  | 7.877885  |
| 98 | 1 | 0 | 5.660658  | 5.864193  | 7.970211  |

---

## REFERENCES

1. D. Heift, Z. Benko and H. Grützmacher, *Dalton Trans.*, 2014, **43**, 5920-5928.
2. K. M. Szkop, A. R. Jupp, H. Razumkov, M. Xu and D. W. Stephan, *Chem. Eur. J.*, 2019, **25**, 10084.
3. M. J. Frisch, G. W. Trucks, H. B. Schlegel, G. E. Scuseria, M. A. Robb, J. R. Cheeseman, G. Scalmani, V. Barone, G. A. Petersson, H. Nakatsuji, M. C. X. Li, A. Marenich, J. Bloino, B. G. Janesko, R. Gomperts, B. Mennucci, H. P. Hratchian, J. V. Ortiz, A. F. Izmaylov, J. L. Sonnenberg, D. Williams-Young, F. Ding, F. Lipparini, F. Egidi, J. Goings, B. Peng, A. Petrone, T. Henderson, D. Ranasinghe, V. G. Zakrzewski, J. Gao, N. Rega, G. Zheng, W. Liang, M. Hada, M. Ehara, K. Toyota, R. Fukuda, J. Hasegawa, M. Ishida, T. Nakajima, Y. Honda, O. Kitao, H. Nakai, T. Vreven, K. Throssell, J. J. A. Montgomery, J. E. Peralta, F. Ogliaro, M. Bearpark, J. J. Heyd, E. Brothers, K. N. Kudin, V. N. Staroverov, T. Keith, R. Kobayashi, J. Normand, K. Raghavachari, A. Rendell, J. C. Burant, S. S. Iyengar, J. Tomasi, M. Cossi, J. M. Millam, M. Klene, C. Adamo, R. Cammi, J. W. Ochterski, R. L. Martin, K. Morokuma, O. Farkas, J. B. Foresman and D. J. Fox, *Gaussian 09, Revision E.01.*, Wallingford CT, 2016.
4. (a) J. D. Chai and M. Head-Gordon, *Phys. Chem. Chem. Phys.*, 2008, **10**, 6615-6620; (b) A. D. McLean and G. S. Chandler, *J. Chem. Phys.*, 1980, **72**, 5639-5648 ; (c) K. Raghavachari, J. S. Binkley, R. Seeger and J. A. Pople, *J. Chem. Phys.*, , , 1980, **72**, 650–654; (d) K. Raghavachari and G. W. Trucks, *J. Chem. Phys.*, 1989, **91**, 1062–1065; (e) J.-P. Blaudeau, M. P. McGrath, L. A. Curtiss and L. Radom, *J. Chem. Phys.*, 1997, **107**, 5016–5021; (f) M. P. McGrath and L. Radom, *J. Chem. Phys.*, 1991, **94**, 511–516; (g) L. A. Curtiss, M. P. McGrath, J.-P. Blaudeau, N. E. Davis, R. C. B. Jr. and L. Radom, *J. Chem. Phys.*, 1995, **103**, 6104–6113; (h) A. J. H. Wachters, *J. Chem. Phys.*, 1970, **52**, 1033–1036; (i) P. J. Hay, *J. Chem. Phys.*, 1977, **66**, 4377–4384; (j) R. C. B. Jr. and L. A. Curtiss, *J. Comp. Chem.*, 1990, **11**, 1206–1216; (k) T. Clark, J. Chandrasekhar, G. W. Spitznagel and P. V. R. Schleyer, *J. Comp. Chem.*, 1983, **4**, 294–301.
